# Supplementary material
Source: ML conference proceedings conference paper supplement (https://openreview.net/forum?id=ayF8bEKYQy)
Supplement: supplementary_material [file attachment]

# OlympicArena datacard

## OlympicArena

OlympicArena is a comprehensive, highly-challenging, and rigorously curated benchmark featuring a detailed, fine-grained evaluation mechanism designed to assess advanced AI capabilities across a broad spectrum of Olympic-level challenges.

### Dataset Link

[Github Repo](#)

[Hugging Face Dataset](#)

[Croissant metadata](#)

### Data Card Author(s)

- Zhen Huang

## Dataset Owners

### Team(s)

Generative AI Research Lab (GAIR)

### Contact Detail(s)

- **Dataset Owner(s):** Generative AI Research Lab (GAIR)
- **Affiliation:** Shanghai Jiao Tong University
- **Group Email:** [gair.olympicarena@gmail.com](mailto:gair.olympicarena@gmail.com)
- **Website:** <https://gair-nlp.github.io/OlympicArena/>

### Author(s)

Zhen Huang, Zengzhi Wang, Shijie Xia, Xuefeng Li, Haoyang Zou, Ruijie Xu, Run-Ze Fan, Lyumanshan Ye, Ethan Chern, Yixin Ye, Yikai Zhang, Yuqing Yang, Ting

Wu, Binjie Wang, Shichao Sun, Yang Xiao, Yiyuan Li, Fan Zhou, Steffi Chern, Yiwei Qin, Yan Ma, Jiadi Su, Yixiu Liu, Yuxiang Zheng, Shaoting Zhang, Dahua Lin, Yu Qiao, Pengfei Liu

## Funding Sources

### Institution(s)

- Shanghai Jiao Tong University

### Funding or Grant Summary(ies)

N/A

## Dataset Overview

### Data Subject(s)

- Data about scientific problems

### Dataset Snapshot

| Category                    | Data  |
|-----------------------------|-------|
| Size of Dataset             | 266MB |
| Number of Instances         | 11163 |
| Number of Fields            | 14    |
| Labeled Classes             | N/A   |
| Number of Labels            | N/A   |
| Average Labels Per Instance | N/A   |
| Algorithmic Labels          | N/A   |
| Human Labels                | N/A   |

### Content Description

This benchmark encompasses seven disciplines: Mathematics, Physics, Chemistry, Biology, Geography, Astronomy, and Computer Science. Each discipline is divided into two splits: validation (val) and test. The validation split

includes publicly available answers for small-scale testing and evaluation, while the test split does not disclose the answers, users could submit their results through our platform.

## Sensitivity of Data

N/A

## Dataset Version and Maintenance

### Maintenance Status

**Actively Maintained** - No new versions will be made available, but this dataset will be actively maintained, including but not limited to updates to the data.

### Version Details

**Current Version:** 1.0

**Last Updated:** 06/2024

**Release Date:** 06/2024

### Maintenance Plan

**Versioning:** N/A.

**Feedback:** For feedback, reach out to [gair.olympicarena@gmail.com](mailto:gair.olympicarena@gmail.com) or open an issue on our [Github Repo](#)

## Example of Data Points

### Primary Data Modality

- Text
- Image

### Sampling of Data Points

Explore OlympicArena on our [Hugging Face Dataset](#).

## Data Fields

| Field Name      | Description                                                                                                                                                                          |
|-----------------|--------------------------------------------------------------------------------------------------------------------------------------------------------------------------------------|
| id              | The unique identifier for each problem                                                                                                                                               |
| problem         | The problem statement                                                                                                                                                                |
| prompt          | The prompt used as input to the model (as used in the paper); we also encourage users to try their own prompts                                                                       |
| figure_urls     | Links to images that appear in the problem, in order                                                                                                                                 |
| answer          | The answer to the problem                                                                                                                                                            |
| answer_type     | The type of the answer                                                                                                                                                               |
| unit            | The unit corresponding to the answer                                                                                                                                                 |
| answer_sequence | The sequence in which the model should provide answers if multiple quantities are required                                                                                           |
| type_sequence   | The sequence of answer_type for each quantity if multiple quantities are required                                                                                                    |
| test_cases      | Test cases used for evaluation in CS code generation problems                                                                                                                        |
| subject         | The subject of the problem                                                                                                                                                           |
| language        | The language of the problem, where EN represents English and ZH represents Chinese                                                                                                   |
| modality        | The modality type of the problem statement, where text-only indicates the problem statement does not contain images, and multi-modal indicates the problem statement contains images |

## Typical Data Point

Below is a dev example from Math:

```
# Problem
If  $x$  is a real number so  $3^x=27x$ , compute  $\log_{\frac{1}{3}}\left(\frac{3^{3^x}}{x^3}\right)$ .

# Answer
81

# Solution
```

We plug in the condition that we were given initially to get a value of  $\log_3 \left( \frac{3^{27x}}{x^{27}} \right)$ . We can simplify this by using the equality again to get  $\log_3 \left( \frac{\left( 3^x \right)^{27}}{x^{27}} \right) = \log_3 \left( \frac{27^{27} * x^{27}}{x^{27}} \right) = \log_3 \left( 27^{27} \right) = 27 * 3 = 81$ .

## Atypical Data Point

The dataset does not contain atypical data points as far as we know.

## Motivation & Intentions

### Motivations

#### Purpose(s)

- research

#### Domain(s) of Application

Machine Learning, Natural Language Processing

#### Motivating Factor(s)

- Advancing AI towards superintelligence, equipping it to address more complex challenges in science and beyond.

#### Intended Use

#### Dataset Use(s)

- Safe for research use

#### Suitable Use Case(s)

- Search for better hyperparameter during training. For example, determine the optimal pre-train data mixing scheme.

## Unsuitable Use Case(s)

- The dataset is created for model evaluation. It is not intended to be used as pre-training data.

## Provenance

### Collection

### Method(s) Used

- human annotation
- website parsing
- Scraped
- AI annotated

### Source Description(s)

- The primary source is Olympic exams freely available on the internet.

### Collection Cadence

**Static:** Data was collected once from single or multiple sources.

### Data Processing

- All questions are parsed by tools and annotated by human annotators.
- Convert complex mathematical notations into standard LATEX formats.
- Deduplication and cleaning
- Human validation

### Use in ML or AI Systems

### Dataset Uses(s)

- Testing
- Validation

- Development or Production Use

## Usage Guidelines(s)

Please visit our [Github Repo](#) for detailed information.

## Distribution(s)

| Set  | Number of data points |
|------|-----------------------|
| Val  | 638                   |
| Test | 9977                  |
| OT   | 548                   |

## Author statement

We recognize that our benchmark may incorporate data from sources where explicit consent has not been obtained from each individual contributor. We have implemented comprehensive measures to ensure the ethical utilization of data and adherence to intellectual property rights. Nonetheless, we accept full responsibility for any potential violations of rights or licensing issues that may emerge from the dataset.

## Licenses

License CC BY-NC-SA 4.0

The OlympicArena Benchmark is licensed under a [Creative Commons Attribution-NonCommercial-ShareAlike 4.0 International License](#).
