# Supplementary material
Source: ML conference proceedings conference paper supplement (https://openreview.net/forum?id=ayF8bEKYQy)
Supplement: supplementary_material [file attachment]

## 526 A Detailed Statistics of the Benchmark

### 527 A.1 Distribution of Problems

528 Our benchmark collects data from various competitions. The detailed list can be found in Table 4.  
 529 Note that a small portion of the problems are sampled from other related benchmarks which are  
 530 marked in the table. The subfields covered by each competition subject are shown in Table 5.  
 531 Additionally, the distribution information of our benchmark across different languages and modalities  
 532 is presented in Table 6.

### 533 A.2 Answer Types

534 Through extensive observation of a large number of problems and a thorough examination of multiple  
 535 previous benchmarks, we have finally distilled 13 comprehensive answer types. These types are  
 536 designed to cover as many problems as possible. The specific definitions for each answer type are  
 537 provided in Table 7.

### 538 A.3 Image Types

539 We categorize and summarize the five most common types of images in our multimodal scientific  
 540 problems. The definitions of these types can be found in Table 8 and examples are provided in  
 541 Figure 5. The distribution of different image types in our benchmark is shown in Figure 6.

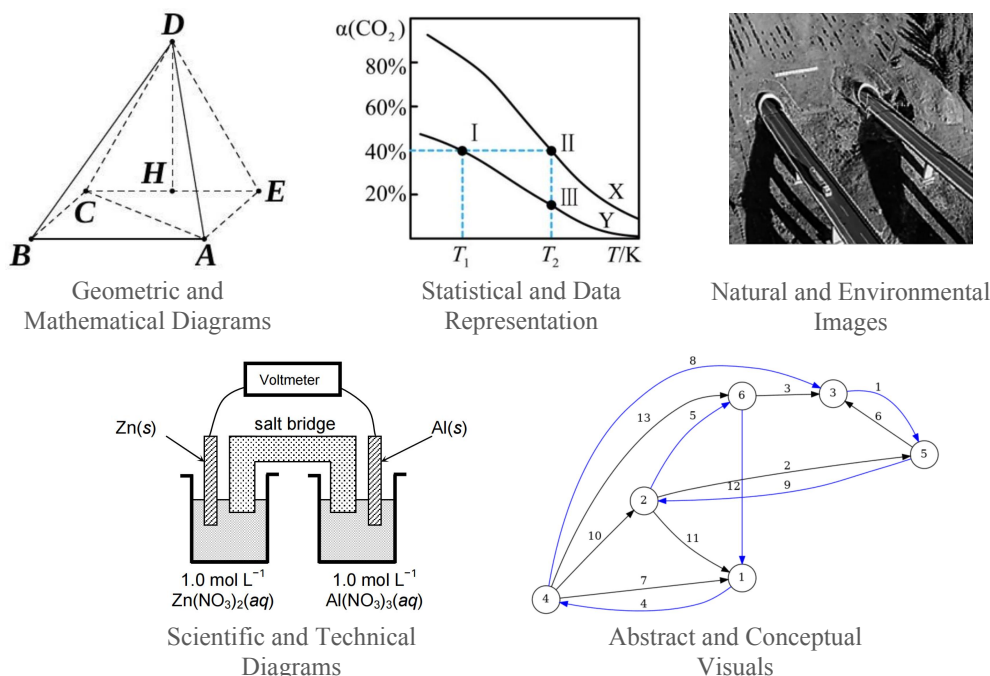

Figure 5: Examples of Image Types

Table 4: List of competitions included in OlympicArena. Competitions marked with \* are partially sourced from OlympiadBench [17], and those marked with † are partially sourced from MMcode [27].

| Competition Name                                         | Abbreviation   | Subject   | # Problems |
|----------------------------------------------------------|----------------|-----------|------------|
| UK Senior Kangaroo                                       | UKMT_SK        | Math      | 20         |
| Math Majors of America Tournament for High Schools       | MMATHS         | Math      | 47         |
| Math Kangaroo                                            | MK             | Math      | 35         |
| Euclid Mathematics Contest                               | EMC            | Math      | 215        |
| Canadian Open Mathematics Challenge                      | COMC           | Math      | 26         |
| Johns Hopkins Mathematics Tournament                     | JHMT           | Math      | 100        |
| Berkeley Math Tournament                                 | BMT            | Math      | 93         |
| Stanford Mathematics Tournament                          | SMT            | Math      | 473        |
| Chinese High School Mathematics League (Pre Round)       | ZH_Math_PRE    | Math      | 546        |
| Chinese High School Mathematics League (1st&2nd Round)   | ZH_Math_12     | Math      | 279        |
| Duke University Math Meet                                | DMM            | Math      | 107        |
| The Princeton University Mathematics Competition         | PUMaC          | Math      | 296        |
| Harvard-MIT Mathematics Tournament                       | HMMT           | Math      | 392        |
| William Lowell Putnam Mathematics Competition            | Putnam         | Math      | 136        |
| International Mathematical Olympiad*                     | IMO            | Math      | 79         |
| Romanian Master of Mathematics*                          | RMM            | Math      | 8          |
| American Regions Mathematics League*                     | ARML           | Math      | 374        |
| Euclid Mathematics Competition*                          | EMC            | Math      | 215        |
| European Girls' Mathematical Olympiad*                   | EGMO           | Math      | 7          |
| F=MA                                                     | FMA            | Physics   | 122        |
| Intermediate Physics Challenge (Y11)                     | BPhO_IPC       | Physics   | 50         |
| Senior Physics Challenge                                 | BPhO_SPC       | Physics   | 38         |
| Australian Science Olympiads Physics                     | ASOP           | Physics   | 48         |
| European Physics Olympiad                                | EPhO           | Physics   | 15         |
| Nordic-Baltic Physics Olympiad                           | NBPhO          | Physics   | 102        |
| World Physics Olympics                                   | WoPhO          | Physics   | 38         |
| Asian Physics Olympiad                                   | APhO           | Physics   | 126        |
| International Physics Olympiad                           | IPhO           | Physics   | 307        |
| Canadian Association of Physicists                       | CAP            | Physics   | 100        |
| Physics Bowl                                             | PB             | Physics   | 100        |
| USA Physics Olympiad                                     | USAPhO         | Physics   | 188        |
| Chinese Physics Olympiad                                 | CPhO           | Physics   | 462        |
| Physics Challenge (Y13)                                  | PCY13          | Physics   | 44         |
| Chinese High School Biology Challenge                    | GAOKAO_Bio     | Biology   | 652        |
| International Biology Olympiad                           | IBO            | Biology   | 300        |
| The USA Biology Olympiad                                 | USABO          | Biology   | 96         |
| Indian Biology Olympiad                                  | INBO           | Biology   | 86         |
| Australian Science Olympiad Biology                      | ASOB           | Biology   | 119        |
| British Biology Olympiad                                 | BBO            | Biology   | 82         |
| New Zealand Biology Olympiad                             | NZIBO          | Biology   | 223        |
| Chem 13 News                                             | Chem13News     | Chemistry | 56         |
| Avogadro                                                 | Avogadro       | Chemistry | 55         |
| U.S. National Chemistry Olympiad (local)                 | USNCO (local)  | Chemistry | 54         |
| U.S. National Chemistry Olympiad                         | USNCO          | Chemistry | 98         |
| Chinese High School Chemistry Challenge                  | GAOKAO_Chem    | Chemistry | 568        |
| Canadian Chemistry Olympic                               | CCO            | Chemistry | 100        |
| Australian Science Olympiad Chemistry                    | ASOC           | Chemistry | 91         |
| Cambridge Chemistry Challenge                            | C3H6           | Chemistry | 61         |
| UK Chemistry Olympiad                                    | UKChO          | Chemistry | 100        |
| International Chemistry Olympiad                         | IChO           | Chemistry | 402        |
| Chinese High School Geography Challenge                  | GAOKAO_Geo     | Geography | 862        |
| US Earth Science Organization                            | USES           | Geography | 301        |
| Australian Science Olympiad Earth Science                | ASOE           | Geography | 100        |
| The International Geography Olympiad                     | IGEO           | Geography | 327        |
| Chinese High School Astronomy Challenge                  | GAOKAO_Astro   | Astronomy | 740        |
| The International Astronomy and Astrophysics Competition | IAAC           | Astronomy | 50         |
| USA Astronomy and Astrophysics Organization              | USAAAO         | Astronomy | 100        |
| British Astronomy and Astrophysics Olympiad Challenge    | BAAO_challenge | Astronomy | 148        |
| British Astronomy and Astrophysics Olympiad-round2       | BAAO           | Astronomy | 185        |
| USA Computing Olympiad                                   | USACO          | CS        | 48         |
| Atcoder                                                  | Atcoder        | CS        | 48         |
| Codeforces†                                              | CF             | CS        | 138        |

Table 5: Subfields of each subject included in OlympicArena.

| Subject   | Subfields                                                                                                                             |
|-----------|---------------------------------------------------------------------------------------------------------------------------------------|
| Math      | Algebra, Geometry, Number Theory, Combinatorics                                                                                       |
| Physics   | Mechanics, Electricity and Magnetism, Waves and Optics, Thermodynamics, Modern Physics, Fluid Mechanics                               |
| Chemistry | General Chemistry, Organic Chemistry, Inorganic Chemistry, Analytical Chemistry, Physical Chemistry, Environmental Chemistry          |
| Biology   | Cell biology, Plant Anatomy and Physiology, Animal Anatomy and Physiology, Ethology, Genetics and Evolution, Ecology , Biosystematics |
| Geography | Physical Geography, Human Geography, Regional Geography, Environmental Geography, Geospatial Techniques                               |
| Astronomy | Fundamentals of Astronomy, Stellar Astronomy, Galactic and Extragalactic Astronomy, Astrophysics                                      |
| CS        | Data Structures, Algorithm                                                                                                            |

Table 6: Statistics of OlympicArena benchmark across different disciplines and modalities.

|                   | Mathematics | Physics | Chemistry | Biology | Geography | Astronomy | CS  |
|-------------------|-------------|---------|-----------|---------|-----------|-----------|-----|
| EN & text         | 2215        | 632     | 782       | 352     | 211       | 219       | 90  |
| EN & multi-modal  | 193         | 646     | 235       | 554     | 517       | 264       | 144 |
| ZH & text         | 780         | 164     | 124       | 312     | 58        | 264       | 0   |
| ZH & multi-modal  | 45          | 298     | 444       | 340     | 804       | 476       | 0   |
| Total EN          | 2408        | 1278    | 1017      | 906     | 728       | 483       | 234 |
| Total ZH          | 825         | 462     | 568       | 652     | 862       | 740       | 0   |
| Total text        | 2995        | 796     | 906       | 664     | 269       | 483       | 90  |
| Total multi-modal | 238         | 944     | 679       | 894     | 1321      | 740       | 144 |
| Grand Total       | 3233        | 1740    | 1585      | 1558    | 1590      | 1223      | 234 |

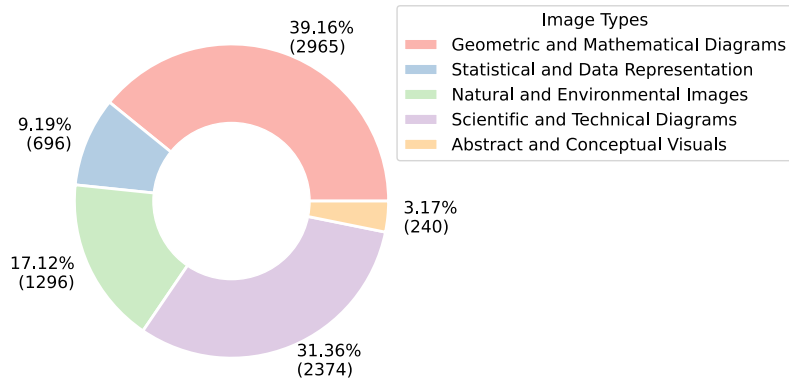

Figure 6: Distribution of Image Types

Table 7: Answer Types and Definitions

| Answer Type            | Definition                                                                                                                                           |
|------------------------|------------------------------------------------------------------------------------------------------------------------------------------------------|
| Single Choice (SC)     | Problems with only one correct option (e.g., one out of four, one out of five, etc.).                                                                |
| Multiple-choice (MC)   | Problems with multiple correct options (e.g., two out of four, two out of five, two out of six, etc.).                                               |
| True/False (TF)        | Problems where the answer is either True or False.                                                                                                   |
| Numerical Value (NV)   | Problems where the answer is a numerical value, including special values like $\pi$ , $e$ , $\sqrt{7}$ , $\log_2 9$ , etc., represented in LaTeX.    |
| Set (SET)              | Problems where the answer is a set, such as $\{1, 2, 3\}$ .                                                                                          |
| Interval (IN)          | Problems where the answer is a range of values, represented as an interval in LaTeX.                                                                 |
| Expression (EX)        | Problems requiring an expression containing variables, represented in LaTeX.                                                                         |
| Equation (EQ)          | Problems requiring an equation containing variables, represented in LaTeX.                                                                           |
| Tuple (TUP)            | Problems requiring a tuple, usually representing a pair of numbers, such as $(x, y)$ .                                                               |
| Multi-part Value (MPV) | Problems requiring multiple quantities to be determined within a single sub-problem, such as solving both velocity and time in a physics problem.    |
| Multiple Answers (MA)  | Problems with multiple solutions for a single sub-problem, such as a math fill-in-the-blank problem with answers 1 or -2.                            |
| Code Generation (CODE) | Problems where the answer is a piece of code, requiring the generation of functional code snippets or complete programs to solve the given task.     |
| Others (OT)            | Problems that do not fit into the above categories, such as writing chemical equations or explaining reasons, which require human expert evaluation. |

Table 8: Definitions and examples of five image types in our multi-modal scientific problems.

| Image Type                          | Definition                                                                                                                                                                                                                     |
|-------------------------------------|--------------------------------------------------------------------------------------------------------------------------------------------------------------------------------------------------------------------------------|
| Geometric and Mathematical Diagrams | Includes diagrams representing mathematical concepts, such as 2D and 3D shapes, mathematical notations, function plots.                                                                                                        |
| Statistical and Data Representation | Visualizations for statistical or data information, including multivariate plots, tables, charts (histograms, bar charts, line plots), and infographics.                                                                       |
| Natural and Environmental Images    | Images of natural scenes or phenomena, including environmental studies visualizations, geological and geographical maps, and satellite images.                                                                                 |
| Scientific and Technical Diagrams   | Diagrams used in science, such as cell structures and genetic diagrams in Biology, molecular structures and reaction pathways in Chemistry, force diagrams, circuit diagrams, and astrophysical maps in Physics and Astronomy. |
| Abstract and Conceptual Visuals     | Visuals explaining theories and concepts, including flowcharts, algorithms, logic models, and symbolic diagrams.                                                                                                               |

542 **B Data Annotation**

543 **B.1 Problem Extraction and Annotation**

544 We develop a simple and practical annotation interface using Streamlit<sup>11</sup> (as shown in Figure 7).  
545 Approximately 30 university students are employed to use this interface for annotation. We provide  
546 each annotator with a wage higher than the local average hourly rate. The specific fields annotated  
547 are shown in Figure 8. We use image URLs to represent pictures, which allows for efficient storage  
548 and easy access without embedding large image files directly in the dataset. Each annotated problem  
549 is ultimately stored as a JSON file, facilitating subsequent processing. It is worth mentioning that we  
550 embed several rule-based checks and filtering mechanisms in the annotation interface to minimize  
551 noise from the annotations. When the following situations arise, we promptly identify and correct the  
552 annotations:

- 553 1) When the answer type is **Numerical Value**, and the annotated answer contains a variable.
- 554 2) When the answer type is not **Numerical Value**, but the annotated answer can be parsed as a  
555 numerical value.
- 556 3) When the answer type is **Expression**, and the annotated answer contains an equals sign.
- 557 4) When the answer type is **Equation**, and the annotated answer does not contain an equals sign.
- 558 5) When the annotated answer contains images that should not be present.
- 559 6) When the annotated answer contains units (since units are a separate field according to Figure 8)  
560 we compile a list of common units and manually check and correct answers when suspected units are  
561 detected).
- 562 7) When the annotated image links cannot be previewed properly.

563 Additionally, we implement a multi-step validation process after the initial annotation is completed.  
564 First, we conduct a preliminary check using predefined rules to identify any error data, which is then  
565 corrected. Following this, a secondary review is performed by different annotators to further check  
566 and correct any errors in the annotations. This cross-checking mechanism helps ensure the accuracy  
567 and consistency of the annotations.

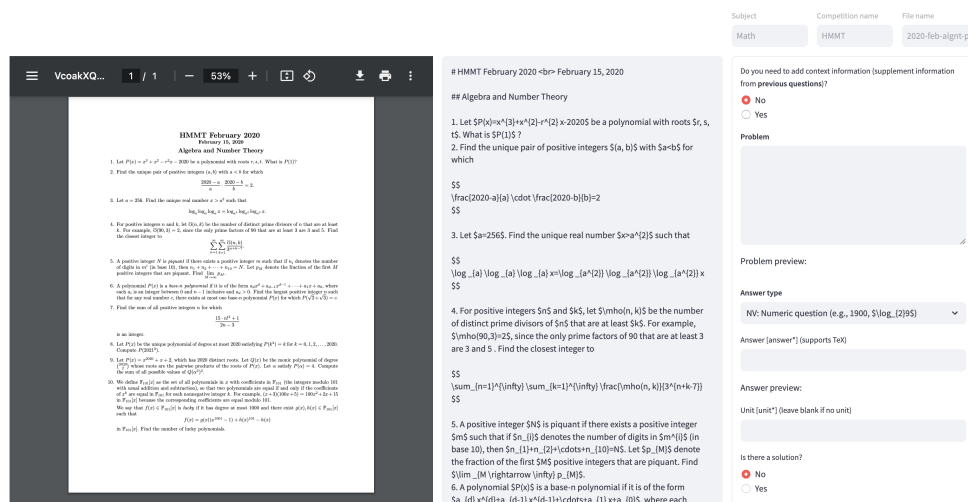

Figure 7: Annotation Page

<sup>11</sup><https://streamlit.io/>

```

{
  "answer_type": "SC",
  "context": null,
  "problem": "The numbers from 1 to 9 are to be distributed to the nine squares in the diagram according to the following rules: There is to be one number in each square. The sum of three adjacent numbers is always a multiple of 3 . The numbers 7 and 9 are already written in. How many ways are there to insert the remaining numbers?\n\n[figure1]",
  "options": {
    "A": "9",
    "B": "12",
    "C": "15",
    "D": "18",
    "E": "24"
  },
  "answer": "E",
  "unit": null,
  "answer_sequence": null,
  "type_sequence": null,
  "solution": null,
  "figure_urls": {
    "1": {
      "url": "https://i.postimg.cc/mgXQHsKB/image.png",
      "type": "I",
      "caption": "The image displays a simple, black and white representation of a bar graph. The graph consists of a single horizontal bar that is divided into two sections. The left section of the bar is labeled with the number \"7\" and the right section is labeled with the number \"9\". The numbers are placed inside the respective sections of the bar, indicating their values. The bar graph does not contain any additional text or elements. The style of the image is minimalistic, with a clear focus on the numerical data represented by the bar."
    }
  },
  "subject": "Math",
  "competition": "MK",
  "file_name": "2023_Student",
  "language": "EN",
  "modality": "multi-modal"
}

```

Figure 8: Example of a json-formatted representation of an annotated problem.

## B.2 Annotation for Difficulty Levels

The definitions of three levels of difficulty are as follows:

- 1) **Knowledge Recall:** This involves the direct recall of factual information and well-defined procedures. It examines the memory of simple knowledge points, i.e., whether certain information is known.
- 2) **Concept Application:** This category covers the very basic use of simple concepts to solve easy problems or perform straightforward calculations. It involves applying known information to situations without any complex or multi-step reasoning. The focus is on straightforward application rather than reasoning.
- 3) **Cognitive Reasoning:** This involves the use of logical reasoning or visual reasoning to solve problems. It includes problems that require clear thinking and problem-solving techniques. It focuses on the ability to reason and analyze to understand and address the issues.

The prompt we use for categorizing each problem is shown in Figure 9

## B.3 Cognitive Reasoning Abilities Annotation

We provide detailed definitions for each of these cognitive reasoning abilities.

The logical reasoning abilities:

- 1) **Deductive Reasoning** involves starting with a general principle or hypothesis and logically deriving specific conclusions. This process ensures that the conclusion necessarily follows from the premises.
- 2) **Inductive Reasoning** involves making broad generalizations from specific observations. This type of reasoning infers general principles from specific instances, enhancing our confidence in the generality of certain phenomena.

Problem description:  
{problem}

Answer:  
{answer}

Solution:  
{solution}\*

Classification Categories:

1. Knowledge Recall: Direct recall of factual information and well-defined procedures. This category examines the memory of simple knowledge points, i.e., whether certain information is known.

2. Concept Application: Very basic use of simple concepts to solve easy problems or do straightforward calculations. This involves applying known information to situations without any complex or multi-step reasoning. The focus is on straightforward application rather than reasoning.

3. Cognitive Reasoning: Use of logical reasoning or visual reasoning to solve problems. This category includes problems that require clear thinking and problem-solving techniques. It focuses on the ability to reason and analyze to understand and address the issues.

Instructions for Classification: Please classify the above problem by selecting the most appropriate category that best represents the type of thinking and approach required to address the problem. Consider the complexity, the need for creativity, and the depth of knowledge required. You should conclude your response with "So, the problem can be categorized as ANSWER.", where ANSWER should be one of the indexes in 1, 2, 3.

Figure 9: The prompt template used for annotating the difficulty level of problems. The "solution" part marked with \* is optional.

- 589 3) **Abductive Reasoning** starts with incomplete observations and seeks the most likely explanation.  
590 It is used to form hypotheses that best explain the available data.
- 591 4) **Analogical Reasoning** involves using knowledge from one situation to solve problems in a similar  
592 situation by drawing parallels.
- 593 5) **Cause-and-Effect Reasoning** identifies the reasons behind occurrences and their consequences.  
594 This reasoning establishes causal relationships between events.
- 595 6) **Critical Thinking** involves objectively analyzing and evaluating information to form a reasoned  
596 judgment. It encompasses questioning assumptions and considering alternative explanations.
- 597 7) **Decompositional Reasoning** breaks down complex problems or information into smaller, more  
598 manageable parts for detailed analysis.
- 599 8) **Quantitative Reasoning** involves using mathematical skills to handle quantities and numerical  
600 concepts, essential for interpreting data and performing calculations.
- 601 The visual reasoning abilities:
- 602 1) **Pattern Recognition** is the ability to identify and understand repeating forms, structures, or  
603 recurring themes, especially when presented visually. This skill is critical in subjects like Chemistry  
604 for recognizing molecular structures, Biology for identifying cellular components, and Geography  
605 for interpreting topographic maps.
- 606 2) **Spatial Reasoning** is the ability to understand objects in both two and three-dimensional terms  
607 and draw conclusions about them with limited information. This skill is often applied in subjects like  
608 Math.

Table 9: LMMs and their corresponding LLMs.

| LMM                | LLM                  |
|--------------------|----------------------|
| GPT-4o             | GPT-4o               |
| GPT-4v             | GPT-4                |
| Claude3 Sonnet     | Claude3 Sonnet       |
| Gemini Pro Vision  | Gemini Pro           |
| LLaVA-NeXT-34B     | Nous-Hermes-2-Yi-34B |
| InternVL-Chat-V1.5 | InternLM2-20B-Chat   |
| Yi-VL-34B          | Yi-34B-Chat          |
| Qwen-VL-Chat       | Qwen-7B-Chat         |

Two-Dimensional Examples: Plane geometry, segments, lengths.

Three-Dimensional Examples: Solid geometry, spatial visualization

3) **Diagrammatic Reasoning** represents the capability to solve problems expressed in diagrammatic form, understanding the logical connections between shapes, symbols, and texts.

Examples: Reading various forms of charts and graphs, obtaining and analyzing statistical information from diagrams.

4) **Symbol Interpretation** is the ability to decode and understand abstract and symbolic visual information. Examples: Understanding abstract diagrams, interpreting symbols, including representations of data structures such as graphs and linked lists

5) **Comparative Visualization** represents comparing and contrasting visual elements to discern differences or similarities, often required in problem-solving to determine the relationship between variable components.

The prompt we use for annotating different logical reasoning abilities and visual reasoning abilities are shown separately in Figure 10 and Figure 11

## C Experiment Details

### C.1 Prompt for Image Caption

The prompt we use for captioning each image in the benchmark for LMMs is shown in Figure 12

### C.2 Models

In our experiments, we evaluate a range of both open-source and proprietary LMMs and LLMs. For LMMs, we select the newly released GPT-4o [36] and the powerful GPT-4V [1] from OpenAI. Additionally, we include Claude3 Sonnet [3] from Anthropic, and Gemini Pro Vision [2] [45] from Google, and Qwen-VL-Max [6] from Alibaba. We also evaluate several open-source models, including LLaVA-NeXT-34B [31], InternVL-Chat-V1.5 [12], Yi-VL-34B [55], and Qwen-VL-Chat [7]. For LLMs, we primarily select the corresponding text models of the aforementioned LMMs, such as GPT-4 [2]. Additionally, we include open-source models like Qwen-7B-Chat, Qwen1.5-32B-Chat [5], Yi-34B-Chat [55], and InternLM2-Chat-20B [8]. Table 9 shows the relationship between LMMs and their corresponding LLMs. For the proprietary models, we call the APIs, while for the open-source models, we run them on an 8-card A800 cluster.

<sup>12</sup>We do not test Gemini-1.5-pro [39] as there are significant rate limits on accessing the model’s API during the time we do experiments.



Problem description:  
{problem}

Answer:  
{answer}

Solution:  
{solution}\*

You need to identify and select the specific types of logical reasoning abilities required to solve the question from the list provided below.

Logical Reasoning Abilities:

1. Deductive Reasoning: Deductive reasoning involves starting with a general principle or hypothesis and logically deriving specific conclusions. This process ensures that the conclusion necessarily follows from the premises.
2. Inductive Reasoning: Inductive reasoning involves making broad generalizations from specific observations. This type of reasoning infers general principles from specific instances, enhancing our confidence in the generality of certain phenomena.
3. Abductive Reasoning: Abductive reasoning starts with incomplete observations and seeks the most likely explanation. It is used to form hypotheses that best explain the available data.
4. Analogical Reasoning: Analogical reasoning involves using knowledge from one situation to solve problems in a similar situation by drawing parallels.
5. Cause-and-Effect Reasoning: Cause-and-effect reasoning identifies the reasons behind occurrences and their consequences. This reasoning establishes causal relationships between events.
6. Critical Thinking: Critical thinking involves objectively analyzing and evaluating information to form a reasoned judgment. It encompasses questioning assumptions and considering alternative explanations.
7. Decompositional Reasoning: Decompositional reasoning breaks down complex problems or information into smaller, more manageable parts for detailed analysis.
8. Quantitative Reasoning: Quantitative reasoning involves using mathematical skills to handle quantities and numerical concepts, essential for interpreting data and performing calculations.

Analyze the question, its answer and explanation (if provided) to determine which of the above reasoning abilities are necessary. Conclude by clearly stating which reasoning abilities are involved in solving the question using "So, the involved reasoning abilities are ABILITIES", where "ABILITIES" represents the numbers corresponding to the list above, separated by commas if multiple abilities are relevant.

Figure 10: The prompt template used for annotating different logical reasoning abilities of problems. The "solution" part marked with \* is optional.

### 637 C.3 Evaluation Prompts

638 We meticulously design the prompts used for model input during experiments. These prompts are  
639 tailored to different answer types, with specific output formats specified for each type. The detailed  
640 prompt templates are shown in Figure 13 and the different instructions for each answer type are  
641 provided in Table 10

### 642 C.4 Model Hyperparameters

643 For all models, we set the maximum number of output tokens to 2048 and the temperature to 0.0.  
644 When performing code generation (CODE) tasks, the temperature is set to 0.2.

Problem description:  
{problem}

Answer:  
{answer}

Solution:  
{solution}\*

You need to identify and select the specific types of visual reasoning abilities required to solve the question from the list provided below.

Visual Reasoning Abilities:

1. Pattern Recognition: The ability to identify and understand repeating forms, structures, or recurring themes, especially when presented visually. This skill is critical in subjects like Chemistry for recognizing molecular structures, Biology for identifying cellular components, and Geography for interpreting topographic maps.
2. Spatial Reasoning: Spatial reasoning is the ability to understand objects in both two and three-dimensional terms and draw conclusions about them with limited information. This skill is often applied in subjects like Math. Two-Dimensional Examples: Plane geometry, segments, lengths Three-Dimensional Examples: Solid geometry, spatial visualization
3. Diagrammatic Reasoning: The capability to solve problems expressed in diagrammatic form, understanding the logical connections between shapes, symbols, and texts. Examples: Reading various forms of charts and graphs, obtaining and analyzing statistical information from diagrams
4. Symbol Interpretation: The ability to decode and understand abstract and symbolic visual information. Examples: Understanding abstract diagrams, interpreting symbols, including representations of data structures such as graphs and linked lists
5. Comparative Visualization: Comparing and contrasting visual elements to discern differences or similarities, often required in problem-solving to determine the relationship between variable components.

Analyze the question, its answer, and any explanation provided to determine which of the above reasoning abilities are necessary. Conclude by clearly stating which reasoning abilities are involved in solving the question using "So, the involved reasoning abilities are ABILITIES", where "ABILITIES" represents the numbers corresponding to the list above, separated by commas if multiple abilities are relevant.

Figure 11: The prompt template used for annotating different visual reasoning abilities of problems which have multi-modal inputs. The "solution" part marked with \* is optional.

## 645 C.5 Answer-level Evaluation Protocols

646 **Rule-based Evaluation** For problems with fixed answers, we extract the final answer enclosed in  
647 "`\boxed{ }`" (using prompts to instruct models to conclude their final answers with boxes) and perform  
648 rule-based matching according to the answer type.

649 1) For numerical value (NV) answers, we handle units by explicitly stating them in the prompts  
650 provided to the model, if applicable. During evaluation, we assess only the numerical value output by  
651 the model, disregarding the unit. In cases where numerical answers are subject to estimation, such  
652 as in physics or chemistry problems, we convert both the model's output and the correct answer to  
653 scientific notation. If the exponent of 10 is the same for both, we allow a deviation of 0.1 in the  
654 coefficient before the exponent, accounting for minor estimation errors in the model's calculations.

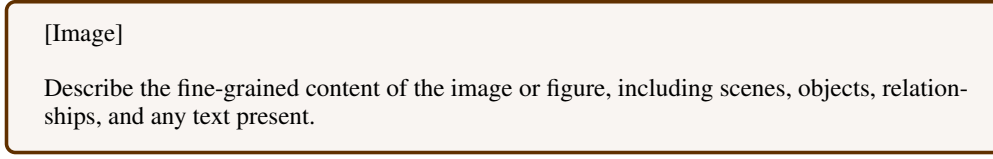

Figure 12: The prompt template used for image caption.

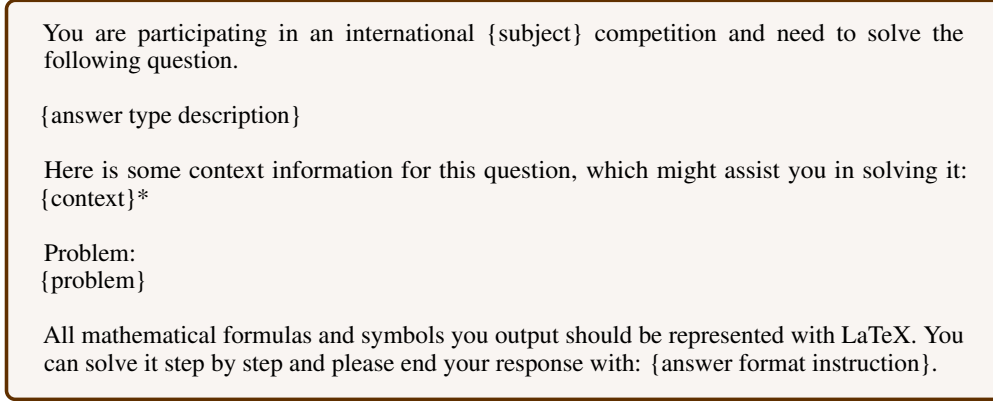

Figure 13: The prompt template used for problem input. The "context" part marked with \* is optional and refers to supplementary information provided during manual annotation when the problem relies on conclusions from previous questions. The {answer type description} and {answer format instruction} are specified in Table 10

- 655 2) For problems where the answer type is an expression (**EX**) or an equation (**EQ**), we use the  
 656 SymPy<sup>13</sup> library for comparison. This allows us to accurately assess the equivalence of algebraic  
 657 expressions and equations by symbolic computation.
- 658 3) For problems requiring the solution of multiple quantities (**MPV**), our evaluation strictly follows  
 659 the order of output specified in the prompt, ensuring consistency and correctness in the sequence of  
 660 results.
- 661 4) In the case of problems with multiple answers (**MA**), we require the model to output all possible  
 662 answers, adequately considering various scenarios.
- 663 5) For problems where the answer type is an interval (**IN**), we strictly compare the open and closed  
 664 intervals as well as the boundary values of the endpoints.
- 665 6) For problems where the answer type is a set (**SET**), we compare the set output by the model with  
 666 the standard answer set to ensure they are completely identical. For problems where the answer type  
 667 is a tuple (**TUP**), we compare the tuple output by the model with the standard answer tuple to ensure  
 668 that each corresponding position is exactly equal.
- 669 7) For code generation (**CODE**) problems, we extract the code output by the model and test it through  
 670 all provided test cases. Specifically, we use the unbiased pass@k metric,

$$\text{pass @}k := \mathbb{E}_{\text{Problems}} \left[ 1 - \frac{\binom{n-c}{k}}{\binom{n}{k}} \right] \quad (1)$$

671 where we set  $k = 1$  and  $n = 5$ , and  $c$  indicates the number of correct samples that pass all test cases.

<sup>13</sup><https://www.sympy.org/>

672 **Model-based Evaluation** To deal with those problems with answer types that cannot be appropri-  
 673 ately evaluated using rule-based matching, we employ model-based evaluation. In this approach, we  
 674 utilize GPT-4V as the evaluator. We design prompts that include the problem, the correct answer, the  
 675 solution (if provided), and the response from the model being tested (see Figure 14 for details). The  
 676 evaluator model then judges the correctness of the tested model's response.

677 To further ensure the reliability of using a model as an evaluator, we uniformly sampled 100 problems  
 678 across various subjects that involved model evaluation. We have several students with backgrounds  
 679 in science and engineering independently conduct manual evaluations. It turns out that out of the  
 680 100 sampled problems, there is nearly 80% agreement between the human evaluations and the model  
 681 evaluations. Considering that problems requiring model-based evaluation account for approximately  
 682 5% of the total, the error rate can be controlled at around  $20\% \times 5\%$ , which is approximately 1%.  
 683 Therefore, we consider this method to be reliable.

You are an experienced teacher tasked with grading an Olympic-level {subject} exam paper.

The problem's context:  
 {context}\*

Problem:  
 {problem}

The student's answer:  
 {the tested model's response}

The reference answer:  
 {the reference answer}

The reference solution:  
 {the reference solution}\*

Note:  
 (1) You can tolerate some markdown formatting issues.  
 (2) You need to make judgments based on the provided reference answer and reference  
 solution (if provided).  
 You can analyze the answer step by step, and then output `correct` or `incorrect` at the end  
 to express your final judgment.

Figure 14: The prompt used for model-based evaluation. The "context" and "the reference solution" parts marked with \* are optional.

## 684 C.6 Process-level Evaluation Protocols

685 To conduct the process-level evaluation, we utilize a method based on GPT-4V. First, we reformat both  
 686 the gold solution and the model-generated solution for the sampled problems into a neat step-by-step  
 687 format using GPT-4. Then, we employ a carefully designed prompt(see Figure 15) to guide GPT-4V  
 688 using the reformatted gold solution to evaluate the correctness of each step in the model's output,  
 689 assigning a score of 0 for incorrect and 1 for correct steps. The final process-level score for each  
 690 problem is determined by averaging the scores of all the steps.

You are a teacher skilled in evaluating the intermediate steps of a student’s solution to a given problem.

You are given two types of step-by-step solutions: one from the reference answer and the other from the student. Your task is to evaluate the correctness of each step in the student’s solutions using binary scoring: assign a score of 1 for correct steps and 0 for incorrect steps. Use the reference solutions to guide your evaluation.

Follow the format:

Step 1: ...  
Step 2: ...  
Step 3: ...

Please provide the results directly, omitting any introductory or concluding remarks.

# The given question

{the question}

# The reference solution

{the reference solution}

# The student’s solution

{the model’s solution}

# Your scores for each step of the student’s solutions

Figure 15: The prompt used for process-level evaluation.

691 **D Fine-grained Results**

692 **D.1 Results across Logical and Visual Reasoning Abilities**

693 Table 11 and Table 12 show the performance of different models across various logical and visual  
694 reasoning abilities separately.

695 **D.2 Results on Multimodal Problems**

696 Table 13 shows the performance of different models on multimodal problems across different subjects.

697 **D.3 Process-level Evaluation Results**

698 Table 14 shows process-level results of different models across different subjects.

699 **D.4 Results across Different Languages**

700 Table 15 shows results of different models in different languages.

701 **D.5 Error Analysis**

702 We sample incorrect responses from GPT-4V (16 problems per subject, with 8 text-only and 8  
703 multimodal) and have human evaluators analyze and annotate the reasons for these errors. As depicted  
704 in Figure 16, reasoning errors (both logical and visual) constitute the largest category, indicating that  
705 our benchmark effectively highlights the current models’ deficiencies in cognitive reasoning abilities.  
706 Additionally, a significant portion of errors stem from knowledge deficits, suggesting that current  
707 models still lack expert-level domain knowledge and the ability to leverage this knowledge to assist

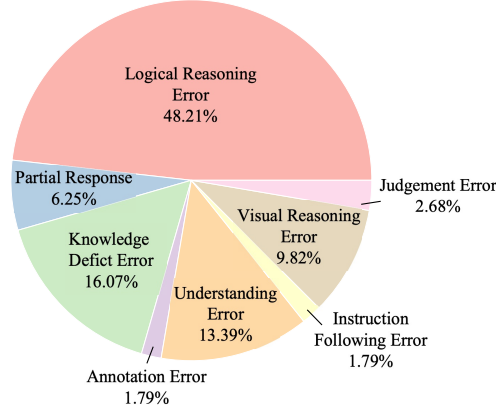

Figure 16: The distribution of error types of 112 sampled problems where GPT-4V makes errors.

in reasoning. Another category of errors arise from understanding biases, which can be attributed to the models’ misinterpretation of context and difficulties in integrating complex language structures and multimodal information. More relevant cases are shown in Appendix [F.1](#)

## E Data Leakage Detection Details

We combine the questions and detailed solutions (or answers if there are no steps) of the problems, then use the n-gram prediction accuracy metric. Specifically, for each sample, we sample k starting points and predict the next 5-gram each time. To evaluate whether the n-gram prediction is correct, we use exact match and more lenient metrics such as edit distance and ROUGE-L. Here, we consider a prediction correct if either the edit distance or ROUGE-L similarity exceeds 75%, to mitigate some reformatting issues during pre-training. We take the union of instances detected by different metrics to obtain the final set of detected instances.

As shown in Tables [16](#), [17](#) and [18](#), the experimental results reveal that indeed, different models exhibit minor leakage across different subjects. An interesting observation is that some leakages detected by the base model are no longer detectable when using the chat model based on the same base model. We hypothesize that optimization for dialogue capabilities potentially impacts the model’s ability and performance on the next token prediction. Another similar observation is that leakages detected by text-only chat models tend to decrease when evaluated on multimodal chat models based on the same chat models. Figure [17](#) presents a data leakage case from Qwen1.5-32B-Chat.

An exact match case of Qwen1.5-32B-Chat

**Text:** The fractional [quantum Hall effect](#) (FQHE) was ... fractionally charged quasiparticles ...  $\times 10^{-31}$  ...  $1.6 \times 10^{-19}$  ...  $\mathrm{~J}$

**Prompt:** The fractional

**Prediction:** The fractional [quantum Hall effect](#) (F

**Prompt:** The fractional quantum Hall effect (FQHE) was ... fraction

**Prediction:** The fractional quantum Hall effect (FQHE) was ... fractionally charged quasip

**Prompt:** The fractional quantum Hall effect (FQHE) was ... fractionally charged quasiparticles ...  $\times$

**Prediction:** The fractional quantum Hall effect (FQHE) was ... fractionally charged quasiparticles ...  $\times 10^{-3}$

**Prompt:** The fractional quantum Hall effect (FQHE) was ... fractionally charged quasiparticles ...  $\times 10^{-31}$  ... 1.

**Prediction:** The fractional quantum Hall effect (FQHE) was ... fractionally charged quasiparticles ...  $\times 10^{-31}$  ...  $1.6 \times 1$

**Prompt:** The fractional quantum Hall effect (FQHE) was ... fractionally charged quasiparticles ...  $\times 10^{-31}$  ...  $1.6 \times 10^{-19}$  ...  $\mathrm{~J}$

**Prediction:** The fractional quantum Hall effect (FQHE) was ... fractionally charged quasiparticles ...  $\times 10^{-31}$  ...  $1.6 \times 10^{-19}$  ...  $\mathrm{~J}$

Figure 17: A potential data leakage case of Qwen1.5-32B-Chat which is presented with the original problem and solution concatenated, separated by a space.

Table 10: Descriptions of answer types and corresponding format instructions included in the problem input prompts. Specifically, {unit description} indicates: "Remember, your answer should be calculated in the unit of {unit}, but do not include the unit in your final answer."

| Answer Type | Answer Type Description                                                                                                                                                               | Answer Format Instruction                                                                                                                                                                                                                                                                                                                                                                                                                                                                                                       |
|-------------|---------------------------------------------------------------------------------------------------------------------------------------------------------------------------------------|---------------------------------------------------------------------------------------------------------------------------------------------------------------------------------------------------------------------------------------------------------------------------------------------------------------------------------------------------------------------------------------------------------------------------------------------------------------------------------------------------------------------------------|
| SC          | This is a multiple choice question (only one correct answer).                                                                                                                         | Please end your response with: "The final answer is $\boxed{ANSWER}$ ", where ANSWER should be one of the options: {the options of the problem}.                                                                                                                                                                                                                                                                                                                                                                                |
| MC          | This is a multiple choice question (more than one correct answer).                                                                                                                    | Please end your response with: "The final answer is $\boxed{ANSWER}$ ", where ANSWER should be two or more of the options: {the options of the problem}.                                                                                                                                                                                                                                                                                                                                                                        |
| TF          | This is a True or False question.                                                                                                                                                     | Please end your response with: "The final answer is $\boxed{ANSWER}$ ", where ANSWER should be either "True" or "False".                                                                                                                                                                                                                                                                                                                                                                                                        |
| NV          | The answer to this question is a numerical value.                                                                                                                                     | {unit instruction} Please end your response with: "The final answer is $\boxed{ANSWER}$ ", where ANSWER is the numerical value without any units.                                                                                                                                                                                                                                                                                                                                                                               |
| SET         | The answer to this question is a set.                                                                                                                                                 | {unit instruction} Please end your response with: "The final answer is $\boxed{ANSWER}$ ", where ANSWER is the set of all distinct answers, each expressed as a numerical value without any units, e.g. ANSWER = {3, 4, 5}.                                                                                                                                                                                                                                                                                                     |
| IN          | The answer to this question is a range interval.                                                                                                                                      | {unit instruction} Please end your response with: "The final answer is $\boxed{ANSWER}$ ", where ANSWER is an interval without any units, e.g. ANSWER = $(1, 2] \cup [7, +\infty)$ .                                                                                                                                                                                                                                                                                                                                            |
| EX          | The answer to this question is an expression.                                                                                                                                         | {unit instruction} Please end your response with: "The final answer is $\boxed{ANSWER}$ ", where ANSWER is an expression without any units and equals signs, e.g. ANSWER = $\frac{1}{2}gt^2$ .                                                                                                                                                                                                                                                                                                                                  |
| EQ          | The answer to this question is an equation.                                                                                                                                           | {unit instruction} Please end your response with: "The final answer is $\boxed{ANSWER}$ ", where ANSWER is an equation without any units, e.g. ANSWER = $\frac{x^2}{4} + \frac{y^2}{2} = 1$ .                                                                                                                                                                                                                                                                                                                                   |
| TUP         | The answer to this question is a tuple.                                                                                                                                               | {unit instruction} Please end your response with: "The final answer is $\boxed{ANSWER}$ ", where ANSWER is a tuple without any units, e.g. ANSWER=(3, 5).                                                                                                                                                                                                                                                                                                                                                                       |
| MPV         | This question involves multiple quantities to be determined.                                                                                                                          | Your final quantities should be output in the following order: {the ordered sequence of the name of multiple quantities}. Their units are, in order, {the ordered sequence of the units}, but units shouldn't be included in your concluded answer. Their answer types are, in order, {the ordered sequence of answer types}. Please end your response with: "The final answers are $\boxed{ANSWER}$ ", where ANSWER should be the sequence of your final answers, separated by commas, for example: 5, 7, 2.5.                 |
| MA          | This question has more than one correct answer, you need to include them all.                                                                                                         | Their units are, in order, {the ordered sequence of the units}, but units shouldn't be included in your concluded answer. Their answer types are, in order, {the ordered sequence of answer types}. Please end your response with: "The final answers are $\boxed{ANSWER}$ ", where ANSWER should be the sequence of your final answers, separated by commas, for example: 5, 7, 2.5.                                                                                                                                           |
| CODE        | Write a Python program to solve the given competitive programming problem using standard input and output methods. Pay attention to time and space complexities to ensure efficiency. | Notes: (1) Your solution must handle standard input and output. Use <code>input()</code> for reading input and <code>print()</code> for output. (2) Be mindful of the problem's time and space complexity. The solution should be efficient and designed to handle the upper limits of input sizes within the given constraints. (3) It's encouraged to analyze and reason about the problem before coding.<br>You can think step by step, and finally output your final code in the following format:<br>Your Python code here |
| OT          | -                                                                                                                                                                                     | -                                                                                                                                                                                                                                                                                                                                                                                                                                                                                                                               |

Table 11: Experimental results across different logical reasoning abilities on OlympicArena benchmark, expressed as percentages, with the highest score in each setting underlined and the highest scores across all settings bolded. **DED**: Deductive Reasoning, **IND**: Inductive Reasoning, **ABD**: Abductive Reasoning, **ANA**: Analogical Reasoning, **CAE**: Cause-and-Effect Reasoning, **CT**: Critical Thinking, **DEC**: Decompositional Reasoning, **QUA**: Quantitative Reasoning.

| Model                | <b>DED</b>   | <b>IND</b>   | <b>ABD</b>   | <b>ANA</b>   | <b>CAE</b>   | <b>CT</b>    | <b>DEC</b>   | <b>QUA</b>   |
|----------------------|--------------|--------------|--------------|--------------|--------------|--------------|--------------|--------------|
|                      | Accuracy     |
| LLMs                 |              |              |              |              |              |              |              |              |
| Qwen-7B-Chat         | 4.85         | 4.18         | 4.84         | 5.29         | 5.54         | 5.16         | 4.09         | 4.64         |
| Yi-34B-Chat          | 19.65        | 13.84        | 26.82        | 18.73        | 26.51        | 25.71        | 15.00        | 15.55        |
| Internlm2-20B-Chat   | 17.43        | 13.12        | 24.74        | 16.30        | 22.81        | 22.51        | 13.03        | 13.42        |
| Qwen1.5-32B-Chat     | 25.94        | 21.20        | 33.39        | 24.87        | 32.33        | 31.82        | 20.19        | 22.19        |
| GPT-3.5              | 19.38        | 13.19        | 26.64        | 16.30        | 23.32        | 24.31        | 14.43        | 17.35        |
| Claude3 Sonnet       | 25.40        | 17.88        | 34.78        | 23.28        | 30.64        | 31.15        | 18.59        | 22.67        |
| GPT-4                | 33.93        | 24.80        | 40.66        | 33.33        | 38.48        | 39.32        | 26.84        | 31.72        |
| GPT-4o               | <u>39.1</u>  | <u>30.14</u> | <u>43.43</u> | <u>37.78</u> | <u>42.89</u> | <u>44.06</u> | <u>31.79</u> | <u>36.56</u> |
| Image caption + LLMs |              |              |              |              |              |              |              |              |
| Qwen-7B-Chat         | 5.66         | 4.69         | 7.27         | 6.88         | 6.66         | 6.02         | 4.60         | 4.81         |
| Yi-34B-Chat          | 19.08        | 13.34        | 29.24        | 20.11        | 25.53        | 24.91        | 13.79        | 14.64        |
| Internlm2-20B-Chat   | 18.25        | 12.69        | 28.37        | 17.67        | 23.84        | 23.35        | 13.40        | 14.52        |
| Qwen1.5-32B-Chat     | 25.50        | 20.55        | 35.81        | 26.35        | 31.35        | 31.39        | 19.55        | 21.51        |
| GPT-3.5              | 20.71        | 13.91        | 29.76        | 17.78        | 25.72        | 26.01        | 15.74        | 17.73        |
| Claude3 Sonnet       | 25.69        | 19.11        | 35.12        | 24.02        | 30.88        | 31.55        | 18.71        | 22.89        |
| GPT-4                | 35.06        | 24.44        | 41.35        | 34.39        | 40.17        | 40.72        | 27.26        | 32.47        |
| GPT-4o               | <u>39.26</u> | <u>30.93</u> | <u>45.50</u> | <u>39.37</u> | <u>43.17</u> | <u>44.19</u> | <u>31.35</u> | <u>36.56</u> |
| LMs                  |              |              |              |              |              |              |              |              |
| Qwen-VL-Chat         | 7.87         | 6.06         | 12.80        | 8.68         | 9.90         | 9.92         | 5.29         | 6.29         |
| Yi-VL-34B            | 16.30        | 10.60        | 21.11        | 16.40        | 21.35        | 20.76        | 11.89        | 13.42        |
| InternVL-Chat-V1.5   | 17.65        | 12.55        | 30.28        | 17.25        | 22.06        | 22.70        | 12.56        | 14.37        |
| LLaVA-NeXT-34B       | 19.72        | 14.70        | 30.62        | 19.37        | 27.40        | 25.39        | 13.62        | 14.79        |
| Qwen-VL-Max          | 22.97        | 16.87        | 33.91        | 21.38        | 29.28        | 28.51        | 17.26        | 18.13        |
| Gemini Pro Vision    | 22.45        | 17.16        | 35.47        | 21.59        | 25.67        | 27.54        | 17.24        | 18.91        |
| Claude3 Sonnet       | 25.59        | 18.89        | 36.51        | 23.70        | 29.89        | 31.71        | 18.99        | 22.87        |
| GPT-4V               | 34.59        | 25.59        | 46.54        | 33.33        | 39.61        | 41.15        | 26.47        | 30.79        |
| GPT-4o               | <b>41.18</b> | <b>32.73</b> | <b>50.35</b> | <b>40.53</b> | <b>45.94</b> | <b>47.12</b> | <b>33.17</b> | <b>37.58</b> |



Table 12: Experimental results across different visual reasoning abilities on OlympicArena benchmark, expressed as percentages, with the highest score in each setting underlined and the highest scores across all settings bolded. **PR**: Pattern Recognition, **SPA**: Spatial Reasoning, **DIA**: Diagrammatic Reasoning, **SYB**: Symbol Interpretation, **COM**: Comparative Visualization.

| Model                | <b>PR</b>           | <b>SPA</b>          | <b>DIA</b>          | <b>SYB</b>          | <b>COM</b>          |
|----------------------|---------------------|---------------------|---------------------|---------------------|---------------------|
|                      | Accuracy            | Accuracy            | Accuracy            | Accuracy            | Accuracy            |
| LLMs                 |                     |                     |                     |                     |                     |
| Qwen-7B-Chat         | 4.59                | 2.64                | 4.26                | 4.01                | 4.66                |
| Yi-34B-Chat          | 23.70               | 13.58               | 19.56               | 17.61               | 22.37               |
| Internlm2-20B-Chat   | 22.89               | 13.06               | 18.63               | 15.73               | 21.16               |
| Qwen1.5-32B-Chat     | 28.93               | 17.94               | 24.67               | 22.18               | 27.83               |
| GPT-3.5              | 22.33               | 13.27               | 18.40               | 16.05               | 21.05               |
| Claude3 Sonnet       | 26.88               | 17.60               | 22.86               | 20.49               | 25.98               |
| GPT-4                | 33.65               | 23.99               | 30.09               | 27.94               | 32.54               |
| GPT-4o               | <u>35.96</u>        | <u>28.71</u>        | <u>33.29</u>        | <u>31.54</u>        | <u>35.00</u>        |
| Image caption + LLMs |                     |                     |                     |                     |                     |
| Qwen-7B-Chat         | 5.96                | 4.11                | 5.21                | 5.11                | 6.30                |
| Yi-34B-Chat          | 21.69               | 21.19               | 18.01               | 14.92               | 20.48               |
| Internlm2-20B-Chat   | 22.97               | 12.75               | 18.27               | 15.49               | 21.05               |
| Qwen1.5-32B-Chat     | 28.59               | 17.81               | 23.90               | 20.95               | 26.73               |
| GPT-3.5              | 23.96               | 15.26               | 19.72               | 17.34               | 22.30               |
| Claude3 Sonnet       | 27.60               | 17.03               | 22.84               | 20.17               | 26.28               |
| GPT-4                | 34.29               | 26.07               | 31.07               | 28.61               | 33.11               |
| GPT-4o               | <u>37.08</u>        | <u>29.10</u>        | <u>33.60</u>        | <u>31.22</u>        | <u>35.91</u>        |
| LMMs                 |                     |                     |                     |                     |                     |
| Qwen-VL-Chat         | 9.90                | 4.93                | 7.46                | 6.48                | 8.91                |
| Yi-VL-34B            | 16.72               | 9.60                | 13.78               | 12.10               | 15.09               |
| InternVL-Chat-V1.5   | 22.85               | 12.11               | 17.68               | 15.11               | 21.27               |
| LLaVA-NeXT-34B       | 24.69               | 12.75               | 19.72               | 16.38               | 22.90               |
| Qwen-VL-Max          | 27.43               | 16.26               | 22.35               | 19.47               | 26.01               |
| Gemini Pro Vision    | 28.98               | 14.83               | 21.65               | 19.79               | 26.13               |
| Claude3 Sonnet       | 27.18               | 17.55               | 22.43               | 20.84               | 25.56               |
| GPT-4V               | 35.28               | 23.91               | 30.25               | 27.70               | 34.40               |
| GPT-4o               | <b><u>41.49</u></b> | <b><u>30.65</u></b> | <b><u>36.98</u></b> | <b><u>33.91</u></b> | <b><u>40.58</u></b> |

Table 13: Experimental results on multimodal problems on OlympicArena benchmark, expressed as percentages, with the highest score in each setting underlined and the highest scores across all settings bolded.

| Model                | Math         | Physics      | Chemistry    | Biology      | Geography    | Astronomy    | CS           | Overall      |
|----------------------|--------------|--------------|--------------|--------------|--------------|--------------|--------------|--------------|
|                      | Accuracy     | Accuracy     | Accuracy     | Accuracy     | Accuracy     | Accuracy     | Pass@1       | Accuracy     |
| LLMs                 |              |              |              |              |              |              |              |              |
| Qwen-7B-Chat         | 1.26         | 2.54         | 6.92         | 5.59         | 4.16         | 2.70         | 0            | 4.01         |
| Yi-34B-Chat          | 5.04         | 6.14         | 19.15        | 27.40        | 33.91        | 10.00        | 0.28         | 19.54        |
| Internlm2-20B-Chat   | 6.30         | 6.46         | 15.76        | 26.96        | 31.87        | 9.19         | 0.97         | 18.51        |
| Qwen1.5-32B-Chat     | 7.98         | 8.90         | 23.86        | 32.21        | 39.74        | 18.65        | 0.83         | 24.58        |
| GPT-3.5              | 6.30         | 7.20         | 15.46        | 26.85        | 30.66        | 11.62        | 6.25         | 18.79        |
| Claude3 Sonnet       | 8.82         | 11.76        | 19.59        | 31.99        | 38.00        | 15.68        | 2.64         | 23.79        |
| GPT-4                | 16.81        | 18.43        | 32.11        | 39.71        | 41.26        | 23.92        | 12.50        | 31.05        |
| GPT-4o               | <u>21.85</u> | <u>21.82</u> | <u>32.11</u> | <u>42.17</u> | <u>44.28</u> | <u>30.68</u> | <u>12.78</u> | <u>34.11</u> |
| Image caption + LLMs |              |              |              |              |              |              |              |              |
| Qwen-7B-Chat         | 3.78         | 2.22         | 6.19         | 6.49         | 7.34         | 5.00         | 0            | 5.32         |
| Yi-34B-Chat          | 5.04         | 6.57         | 14.29        | 24.94        | 33.61        | 8.78         | 0.28         | 18.25        |
| Internlm2-20B-Chat   | 6.72         | 6.89         | 16.35        | 25.39        | 31.26        | 10.27        | 1.18         | 18.41        |
| Qwen1.5-32B-Chat     | 6.72         | 8.69         | 21.80        | 32.10        | 39.82        | 17.30        | 0.97         | 23.99        |
| GPT-3.5              | 4.20         | 12.39        | 18.11        | 25.73        | 32.32        | 9.73         | 7.64         | 20.04        |
| Claude3 Sonnet       | 5.46         | 13.35        | 20.47        | 32.89        | 38.23        | 13.38        | 3.89         | 23.97        |
| GPT-4                | 16.81        | 20.44        | 29.90        | 38.7         | 45.12        | 26.62        | 12.26        | 32.36        |
| GPT-4o               | <u>21.01</u> | <u>22.14</u> | <u>31.22</u> | <u>45.19</u> | <u>45.19</u> | <u>30.54</u> | <b>14.58</b> | <u>34.86</u> |
| LMMs                 |              |              |              |              |              |              |              |              |
| Qwen-VL-Chat         | 3.36         | 2.65         | 6.63         | 9.84         | 13.85        | 5.27         | 0            | 7.82         |
| Yi-VL-34B            | 3.36         | 6.46         | 9.13         | 18.79        | 22.03        | 7.43         | 0            | 13.00        |
| InternVL-Chat-V1.5   | 7.56         | 6.25         | 16.05        | 24.94        | 32.55        | 9.73         | 0.62         | 18.43        |
| LLaVA-NeXT-34B       | 4.62         | 6.46         | 14.43        | 28.30        | 36.11        | 10.00        | 0.28         | 19.66        |
| Qwen-VL-Max          | 6.30         | 7.63         | 17.82        | 28.86        | 40.05        | 15.14        | 1.25         | 22.38        |
| Gemini Pro Vision    | 7.56         | 9.11         | 24.30        | 32.55        | 35.81        | 11.22        | 2.36         | 22.58        |
| Claude3 Sonnet       | 5.46         | 13.45        | 19.15        | 33.22        | 37.02        | 17.30        | 2.36         | 24.05        |
| GPT-4V               | 13.87        | 18.22        | 29.31        | 40.27        | 46.86        | 22.43        | 11.25        | 31.81        |
| GPT-4o               | <b>26.47</b> | <b>22.14</b> | <b>33.14</b> | <b>46.98</b> | <b>53.75</b> | <b>31.76</b> | 13.61        | <b>38.17</b> |

Table 14: Results of the process-level evaluation on our comprehensive OlympicArena benchmark. Each step of every problem is assigned a score of 0 (indicating incorrect) or 1 (indicating correct), with the highest score in each setting underlined and the highest scores across all settings highlighted in bold. The subject of computer science is neglected in this part due to the lack of solutions.

| Model                | Math        | Physics     | Chemistry   | Biology     | Geography   | Astronomy   | Overall     |
|----------------------|-------------|-------------|-------------|-------------|-------------|-------------|-------------|
|                      | Score       |
| LLMs                 |             |             |             |             |             |             |             |
| Qwen-7B-Chat         | 18.7        | 43.7        | 35.1        | 18.9        | 34.5        | 31.5        | 30.4        |
| Yi-34B-Chat          | 30.2        | 51.0        | 54.0        | 31.9        | 36.5        | 40.3        | 40.7        |
| Internlm2-20B-Chat   | 21.2        | 35.0        | 51.2        | 22.7        | 32.9        | 33.3        | 32.7        |
| Qwen1.5-32B-Chat     | 32.0        | 44.0        | 61.1        | 32.0        | 45.2        | 48.6        | 43.8        |
| GPT-3.5              | 37.6        | 46.9        | 32.7        | 30.2        | 38.7        | 26.7        | 35.4        |
| Claude3 Sonnet       | 40.8        | 42.7        | 65.3        | 30.8        | 52.6        | 50.5        | 47.1        |
| GPT-4                | 57.0        | 53.8        | 73.6        | 50.0        | 50.1        | 65.0        | 58.2        |
| GPT-4o               | <u>59.9</u> | <b>65.9</b> | 67.4        | <u>49.6</u> | <b>61.4</b> | <u>69.5</u> | <u>62.3</u> |
| Image caption + LLMs |             |             |             |             |             |             |             |
| Qwen-7B-Chat         | 23.0        | 42.6        | 34.6        | 17.4        | 34.4        | 32.3        | 30.7        |
| Yi-34B-Chat          | 26.3        | 45.6        | 49.5        | 20.0        | 45.7        | 42.0        | 38.2        |
| Internlm2-20B-Chat   | 27.7        | 42.6        | 46.3        | 19.4        | 25.5        | 43.1        | 34.1        |
| Qwen1.5-32B-Chat     | 35.9        | 49.7        | 56.8        | 33.5        | 43.6        | 51.4        | 45.1        |
| GPT-3.5              | 32.1        | 46.7        | 51.2        | 29.1        | 38.4        | 38.2        | 39.3        |
| Claude3 Sonnet       | 50.7        | 51.7        | 66.1        | 33.4        | 55.8        | 52.2        | 51.7        |
| GPT-4                | 61.4        | 53.8        | 62.7        | 51.1        | 52.0        | 62.2        | 57.2        |
| GPT-4o               | <u>54.3</u> | <u>63.3</u> | <u>71.8</u> | <b>58.6</b> | <u>56.6</u> | <u>72.6</u> | <b>62.9</b> |
| LMMs                 |             |             |             |             |             |             |             |
| Qwen-VL-Chat         | 14.3        | 41.7        | 35.7        | 21.0        | 31.0        | 23.6        | 27.9        |
| Yi-VL-34B            | 28.9        | 41.0        | 44.2        | 18.7        | 30.2        | 40.3        | 33.9        |
| InternVL-Chat-V1.5   | 26.6        | 40.5        | 42.7        | 29.4        | 43.1        | 44.8        | 37.8        |
| LLaVA-NeXT-34B       | 30.2        | 47.1        | 50.1        | 19.0        | 40.6        | 47.1        | 39.0        |
| Qwen-VL-Max          | 27.5        | 52.4        | 65.5        | 24.3        | 36.0        | 48.4        | 42.3        |
| Gemini Pro Vision    | 28.5        | 46.4        | 45.2        | 19.9        | 33.5        | 40.5        | 35.7        |
| Claude3 Sonnet       | 47.3        | 46.8        | 63.2        | 24.2        | 43.2        | 48.1        | 45.5        |
| GPT-4V               | 49.9        | 54.0        | 71.1        | 51.4        | 56.3        | 64.3        | 57.8        |
| GPT-4o               | <b>60.2</b> | <u>54.8</u> | <b>72.2</b> | <u>51.6</u> | <u>59.6</u> | <b>74.4</b> | <u>62.1</u> |

Table 15: Experimental results across different languages (English and Chinese) on OlympicArena benchmark, expressed as percentages, with the highest score in each setting underlined and the highest scores across all settings bolded.

| Model                | English             | Chinese             |
|----------------------|---------------------|---------------------|
|                      | Accuracy            | Accuracy            |
| LLMs                 |                     |                     |
| Qwen-7B-Chat         | 4.17                | 4.55                |
| Yi-34B-Chat          | 16.37               | 18.89               |
| Internlm2-20B-Chat   | 16.56               | 16.62               |
| Qwen1.5-32B-Chat     | 22.73               | 25.29               |
| GPT-3.5              | 19.83               | 15.50               |
| Claude3 Sonnet       | 25.73               | 18.20               |
| GPT-4                | 35.13               | 27.31               |
| GPT-4o               | <u>40.65</u>        | <u>33.66</u>        |
| Image caption + LLMs |                     |                     |
| Qwen-7B-Chat         | 4.71                | 5.21                |
| Yi-34B-Chat          | 16.96               | 16.26               |
| Internlm2-20B-Chat   | 17.40               | 16.43               |
| Qwen1.5-32B-Chat     | 22.93               | 24.24               |
| GPT-3.5              | 20.56               | 15.77               |
| Claude3 Sonnet       | 26.31               | 17.43               |
| GPT-4                | 36.08               | 27.40               |
| GPT-4o               | <u>41.50</u>        | <u>33.07</u>        |
| LMMs                 |                     |                     |
| Qwen-VL-Chat         | 7.70                | 5.55                |
| Yi-VL-34B            | 17.34               | 14.68               |
| InternVL-Chat-V1.5   | 17.07               | 15.82               |
| LLaVA-NeXT-34B       | 17.74               | 16.74               |
| Qwen-VL-Max          | 20.14               | 21.49               |
| Gemini Pro Vision    | 21.61               | 18.76               |
| Claude3 Sonnet       | 26.52               | 17.21               |
| GPT-4V               | 36.18               | 26.55               |
| GPT-4o               | <b><u>43.04</u></b> | <b><u>34.39</u></b> |

Table 16: Full results of Data Leakage Detection on the base models or text-only chat models behind the evaluated models (continued). The “Correspondence” column indicates the text-only chat model and multimodal (MM) chat model corresponding to the model being detected. “# Leak.” denotes the number of leakage instances. “# T” represents the number of instances correctly answered among these leaks by the text-only chat model, while “# MM” represents the number of instances correctly answered among these leaks by the multimodal chat model.

| Model to-be-detected | Correspondence       |                   | Math    |     |      | Physics |     |      | Chemistry |     |      |
|----------------------|----------------------|-------------------|---------|-----|------|---------|-----|------|-----------|-----|------|
|                      | Text-only Chat Model | MM Chat Model     | # Leak. | # T | # MM | # Leak. | # T | # MM | # Leak.   | # T | # MM |
| InternLM2-20B        | InternLM2-20B-Chat   | InternVL-Chat-1.5 | 14      | 1   | 2    | 3       | 0   | 0    | 0         | 0   | 0    |
| internLM2-20B-Chat   | InternLM2-20B-Chat   | InternVL-Chat1.5  | 17      | 1   | 0    | 0       | 0   | 0    | 1         | 1   | 1    |
| Yi-34B               | Yi-34B-Chat          | Yi-VL-34B         | 10      | 2   | 2    | 1       | 0   | 0    | 0         | 0   | 0    |
| Yi-34B-Chat          | Yi-34B-Chat          | Yi-VL-34B         | 2       | 0   | 0    | 0       | 0   | 0    | 0         | 0   | 0    |
| Nous-Hermes-2-Yi-34B | -                    | LLaVA-NeXT-34B    | 0       | -   | 0    | 0       | -   | 0    | 0         | -   | 0    |
| Qwen-7B              | Qwen-7B-Chat         | Qwen-VL-Chat      | 8       | 0   | 0    | 1       | 1   | 0    | 0         | 0   | 0    |
| Qwen1.5-32B          | Qwen1.5-32B-Chat     | -                 | 24      | 3   | -    | 3       | 1   | -    | 1         | 0   | -    |
| Qwen1.5-32B-Chat     | Qwen1.5-32B-Chat     | -                 | 19      | 2   | -    | 4       | 2   | -    | 3         | 1   | -    |
| GPT-4o               | GPT-4o               | GPT-4o            | 0       | 0   | 0    | 0       | 0   | 0    | 0         | 0   | 0    |

Table 17: Full results of Data Leakage Detection on the base models or text-only chat models behind the evaluated models (continued). The “Correspondence” column indicates the text-only chat model and multimodal (MM) chat model corresponding to the model being detected. “# Leak.” denotes the number of leakage instances. “# T” represents the number of instances correctly answered among these leaks by the text-only chat model, while “# MM” represents the number of instances correctly answered among these leaks by the multimodal chat model.

| Model to-be-detected | Correspondence       |                   | Biology |     |      | Geography |     |      | Astronomy |     |      |
|----------------------|----------------------|-------------------|---------|-----|------|-----------|-----|------|-----------|-----|------|
|                      | Text-only Chat Model | MM Chat Model     | # Leak. | # T | # MM | # Leak.   | # T | # MM | # Leak.   | # T | # MM |
| InternLM2-20B        | InternLM2-20B-Chat   | InternVL-Chat-1.5 | 0       | 0   | 0    | 0         | 0   | 0    | 1         | 0   | 0    |
| InternLM2-20B-Chat   | InternLM2-20B-Chat   | InternVL-Chat-1.5 | 0       | 0   | 0    | 0         | 0   | 0    | 0         | 0   | 0    |
| Yi-34B               | Yi-34B-Chat          | Yi-VL-34B         | 1       | 0   | 0    | 0         | 0   | 0    | 0         | 0   | 0    |
| Yi-34B-Chat          | Yi-34B-Chat          | Yi-VL-34B         | 0       | 0   | 0    | 0         | 0   | 0    | 0         | 0   | 0    |
| Nous-Hermes-2-Yi-34B | -                    | LLaVA-NeXT-34B    | 0       | -   | 0    | 0         | -   | 0    | 0         | -   | 0    |
| Qwen-7B              | Qwen-7B-Chat         | Qwen-VL-Chat      | 0       | 0   | 0    | 0         | 0   | 0    | 1         | 0   | 0    |
| Qwen1.5-32B          | Qwen1.5-32B-Chat     | -                 | 1       | 0   | -    | 0         | 0   | -    | 5         | 1   | -    |
| Qwen1.5-32B-Chat     | Qwen1.5-32B-Chat     | -                 | 1       | 0   | -    | 0         | 0   | -    | 0         | 0   | -    |
| GPT-4o               | GPT-4o               | GPT-4o            | 0       | 0   | 0    | 0         | 0   | 0    | 0         | 0   | 0    |

Table 18: Full results of Data Leakage Detection on the base models or text-only chat models behind the evaluated models (continued). The “Correspondence” column indicates the text-only chat model and multimodal (MM) chat model corresponding to the model being detected. “# Leak.” denotes the number of leakage instances. “# T” represents the number of instances correctly answered among these leaks by the text-only chat model, while “# MM” represents the number of instances correctly answered among these leaks by the multimodal chat model.

| Model to-be-detected | Correspondence       |                   | CS      |     |      | Overall |     |      |
|----------------------|----------------------|-------------------|---------|-----|------|---------|-----|------|
|                      | Text-only Chat Model | MM Chat Model     | # Leak. | # T | # MM | # Leak. | # T | # MM |
| InternLM2-20B        | InternLM2-20B-Chat   | InternVL-Chat-1.5 | 1       | 1   | 1    | 19      | 2   | 3    |
| InternLM2-20B-Chat   | InternLM2-20B-Chat   | InternVL-Chat-1.5 | 1       | 1   | 1    | 19      | 3   | 2    |
| Yi-34B               | Yi-34B-Chat          | Yi-VL-34B         | 0       | 0   | 0    | 12      | 2   | 2    |
| Yi-34B-Chat          | Yi-34B-Chat          | Yi-VL-34B         | 0       | 0   | 0    | 2       | 0   | 0    |
| Nous-Hermes-2-Yi-34B | -                    | LLaVA-NeXT-34B    | 0       | -   | 0    | 0       | 0   | 0    |
| Qwen-7B              | Qwen-7B-Chat         | Qwen-VL-Chat      | 1       | 1   | 1    | 11      | 2   | 1    |
| Qwen1.5-32B          | Qwen1.5-32B-Chat     | -                 | 9       | -   | -    | 43      | 14  | 0    |
| Qwen1.5-32B-Chat     | Qwen1.5-32B-Chat     | -                 | 3       | 3   | -    | 30      | 8   | 0    |
| GPT-4o               | GPT-4o               | GPT-4o            | 0       | 0   | 0    | 0       | 0   | 0    |

## 726 **F Case Study**

### 727 **F.1 Cases for Error Analysis**

728 From Figure [18](#) to Figure [24](#) we showcase examples of various error types across different disciplines.

## Math - Logical Reasoning Error

### Problem:

In the diagram, rectangle  $PQRS$  is placed inside rectangle  $ABCD$  in two different ways: first, with  $Q$  at  $B$  and  $R$  at  $C$ ; second, with  $P$  on  $AB$ ,  $Q$  on  $BC$ ,  $R$  on  $CD$ , and  $S$  on  $DA$ . [figure1]. If  $AB = 718$  and  $PQ = 250$ , determine the length of  $BC$ .

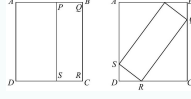

[figure1]

### Solution:

Let  $BC = x$ ,  $PB = b$ , and  $BQ = a$ . Since  $BC = x$ , then  $AD = PS = QR = x$ . Since  $BC = x$  and  $BQ = a$ , then  $QC = x - a$ . Since  $AB = 718$  and  $PB = b$ , then  $AP = 718 - b$ . Note that  $PQ = SR = 250$ . Let  $\angle BQP = \theta$ . Since  $\triangle PBQ$  is right-angled at  $B$ , then  $\angle BPQ = 90^\circ - \theta$ . Since  $BQC$  is a straight angle and  $\angle PQR = 90^\circ$ , then  $\angle RQC = 180^\circ - 90^\circ - \theta = 90^\circ - \theta$ . Since  $APB$  is a straight angle and  $\angle SPQ = 90^\circ$ , then  $\angle APS = 180^\circ - 90^\circ - (90^\circ - \theta) = \theta$ . Since  $\triangle SAP$  and  $\triangle QCR$  are each right-angled and have another angle in common with  $\triangle PBQ$ , then these three triangles are similar. Continuing in the same way, we can show that  $\triangle RDS$  is also similar to these three triangles. Since  $RS = PQ$ , then  $\triangle RDS$  is actually congruent to  $\triangle PBQ$  (angle-side-angle). Similarly,  $\triangle SAP$  is congruent to  $\triangle QCR$ . In particular, this means that  $AS = x - a$ ,  $SD = a$ ,  $DR = b$ , and  $RC = 718 - b$ . Since  $\triangle SAP$  and  $\triangle PBQ$  are similar, then  $\frac{SA}{PB} = \frac{AP}{BQ} = \frac{SP}{PQ}$ . Thus,  $\frac{x-a}{b} = \frac{718-b}{a} = \frac{x}{250}$ . Also, by the Pythagorean Theorem in  $\triangle PBQ$ , we obtain  $a^2 + b^2 = 250^2$ . By the Pythagorean Theorem in  $\triangle SAP$ ,

$$\begin{aligned} x^2 &= (x-a)^2 + (718-b)^2 \\ x^2 &= x^2 - 2ax + a^2 + (718-b)^2 \\ 0 &= -2ax + a^2 + (718-b)^2 \end{aligned}$$

Since  $a^2 + b^2 = 250^2$ , then  $a^2 = 250^2 - b^2$ . Since  $\frac{718-b}{a} = \frac{x}{250}$ , then  $ax = 250(718-b)$ . Therefore, substituting into (\*), we obtain

$$\begin{aligned} 0 &= -2(250)(718-b) + 250^2 - b^2 + (718-b)^2 \\ b^2 &= 250^2 - 2(250)(718-b) + (718-b)^2 \\ b^2 &= ((718-b) - 250)^2 \quad \left( \text{since } y^2 - 2yz + z^2 = (y-z)^2 \right) \\ b^2 &= (468-b)^2 \\ b &= 468 - b \quad (\text{since } b \neq b - 468) \\ 2b &= 468 \\ b &= 234 \end{aligned}$$

Therefore,  $a^2 = 250^2 - b^2 = 250^2 - 234^2 = (250+234)(250-234) = 484 \cdot 16 = 22^2 \cdot 4^2 = 88^2$  and so  $a = 88$ .

Finally,  $x = \frac{250(718-b)}{a} = \frac{250 \cdot 484}{88} = 1375$ . Therefore,  $BC = \boxed{1375}$ .

### GPT 4V's output:

To solve this problem, we can use the Pythagorean theorem. In the first placement of rectangle  $PQRS$  inside rectangle  $ABCD$ , we see that  $PQ$  is parallel to  $AB$  and  $QR$  is parallel to  $BC$ . Since  $PQ = 250$  and  $AB = 718$ , we can denote the length of  $BC$  as  $x$ . In the second placement, the rectangle  $PQRS$  is rotated such that its corners touch the sides of rectangle  $ABCD$ . The diagonal  $PR$  of rectangle  $PQRS$  becomes the diameter of an inscribed circle within rectangle  $ABCD$ . This means that the diagonal  $PR$  is the hypotenuse of a right triangle with sides  $PQ$  and  $QR$ . Since  $PQRS$  is a rectangle,  $PQ = RS$  and  $PS = QR$ . Therefore, the length of  $QR$  is also  $x$ . Now we have a right triangle with sides 250 and  $x$ , and the hypotenuse is the diagonal  $PR$ . Using the Pythagorean theorem, we have:

$$\begin{aligned} PR^2 &= PQ^2 + QR^2 \\ PR^2 &= 250^2 + x^2 \\ PR^2 &= 62500 + x^2 \end{aligned}$$

The diagonal  $PR$  also bisects rectangle  $ABCD$  into two right triangles, each with sides  $AB$  and  $BC$ . Therefore, the length of the diagonal  $PR$  can also be calculated using the Pythagorean theorem with sides  $AB$  and  $BC$ :

$$\begin{aligned} PR^2 &= AB^2 + BC^2 \\ PR^2 &= 718^2 + x^2 \\ PR^2 &= 515524 + x^2 \end{aligned}$$

Since both expressions represent  $PR^2$ , we can set them equal to each other:

$$62500 + x^2 = 515524 + x^2$$

Subtract  $x^2$  from both sides:

$$62500 = 515524$$

Now we see that there is a mistake in the calculation because the left side should not equal the right side directly. We need to subtract 62500 from 515524 to find the value of  $x^2$ :

$$\begin{aligned} x^2 &= 515524 - 62500 \\ x^2 &= 453024 \end{aligned}$$

Now we take the square root of both sides to find  $x$ :

$$\begin{aligned} x &= \sqrt{453024} \\ x &= 673 \end{aligned}$$

Therefore, the length of  $BC$  is 673. The final answer is  $\boxed{673}$ .

Figure 18: An example of a math problem with a logical reasoning error.

## Physics - Logical Reasoning Error

### Problem:

A bead is placed on a horizontal rail, along which it can slide frictionlessly. It is attached to the end of a rigid, massless rod of length  $R$ . A ball is attached at the other end. Both the bead and the ball have mass  $M$ . The system is initially stationary, with the ball directly above the bead. The ball is then given an infinitesimal push, parallel to the rail.[figure1] Assume that the rod and ball are designed in such a way (not shown explicitly in the diagram) so that they can pass through the rail without hitting it. In other words, the rail only constrains the motion of the bead. Two subsequent states of the system are shown below.[figure2] Derive an expression for the force in the rod when the ball is directly below the bead, as shown at right above.

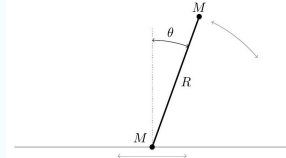

[figure1]

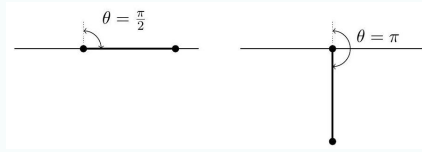

[figure2]

### Solution:

At this point the released gravitational potential energy is  $2MgR$ , and both masses are moving horizontally with speed  $v$ , where

$$2 \frac{1}{2} M v^2 = 2MgR \Rightarrow v = \sqrt{2gR}$$

Work in the frame moving to the right with speed  $v$ . In this frame the bead is stationary and the ball has velocity  $2v$  and is instantaneously rotating about the bead, so it must be experiencing a centripetal force

$$\frac{M(2v)^2}{R} = 8Mg$$

Unlike in part (a), there are no additional contribution from the acceleration of the rotation center, because the bead can only ever accelerate horizontally, and the force in the rod at this moment is vertical. Since the ball also experiences a downward force of  $Mg$  due to gravity, the force in the rod is a tension

$$T = \boxed{9Mg}$$

### GPT 4V's output:

To derive an expression for the force in the rod when the ball is directly below the bead, we can employ the conservation of energy and principles from circular motion.

Since the bead and ball are on a frictionless rail and assuming no other non-conservative forces are acting on the system, the total mechanical energy is conserved. The initial potential energy of the ball when it is given an infinitesimal push will convert into kinetic energy as the ball swings down.

At the top position (initial state), the potential energy (PE) is maximum and kinetic energy (KE) is zero. We define the gravitational potential energy to be zero at the lowest point. At the highest point, the potential energy is  $MgR$  because the height of the ball above the lowest point is  $R$ .

Hence,  $PE_{\text{initial}} = MgR$ .

At the bottom position (final state), when the ball is directly below the bead, all the potential energy will have been converted to kinetic energy (assuming conservation of energy). If  $v$  is the velocity of the ball at the bottom, then  $KE_{\text{final}} = \frac{1}{2} M v^2$ .

Since energy is conserved,  $PE_{\text{initial}} = KE_{\text{final}}$ . Thus,

$$MgR = \frac{1}{2} M v^2$$

$$2gR = v^2$$

$$v = \sqrt{2gR}$$

Now, let us consider the forces acting on the ball at the bottom position. We have the gravitational force  $Mg$  acting downwards and the force in the rod  $F$  acting upwards. When the ball is at the bottom, it is in circular motion and the centripetal force required to keep it in circular motion is provided entirely by the force in the rod, which is the centripetal force  $F_{\text{centripetal}}$ , since gravity acts in the same direction as the centripetal acceleration at this point.

The centripetal force is given by  $F_{\text{centripetal}} = \frac{Mv^2}{R}$ .

Substituting  $v = \sqrt{2gR}$  into the above equation, we get

$$F_{\text{centripetal}} = \frac{M(2gR)}{R}$$

$$F_{\text{centripetal}} = 2Mg$$

Since the centripetal force is provided by the force in the rod and directed towards the center of the circular motion (upwards towards the ball), at this moment, the rod is under tension, not compression.

Thus, the force in the rod when the ball is directly below the bead and in tension is  $F = 2Mg$ .

The final answer is  $\boxed{2Mg}$ .

Figure 19: An example of a physics problem with a logical reasoning error.



## Chemistry - Visual Reasoning Error

### Problem:

At temperature  $t^{\circ}\text{C}$ , a solution is prepared such that  $c(\text{H}_2\text{CO}_3) + c(\text{HCO}_3^-) + c(\text{CO}_3^{2-}) = 1.000 \times 10^{-3} \text{ mol} \cdot \text{L}^{-1}$ . This solution is a mixture of  $\text{H}_2\text{CO}_3$  and  $\text{HCl}$  or  $\text{H}_2\text{CO}_3$  and  $\text{NaOH}$ . The negative logarithms of the concentrations of some particles in the solution ( $-\lg c$ ) versus pH are shown in the figure. Which of the following statements are incorrect:

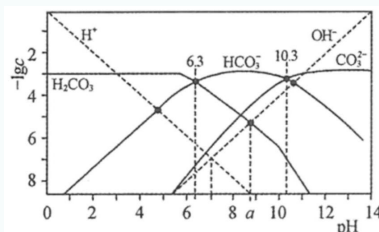

[figure1]

- A: In the solution with  $\text{pH} = a$ :  $c(\text{HCO}_3^-) > c(\text{H}_2\text{CO}_3) > c(\text{CO}_3^{2-}) > c(\text{H}^+)$   
 B: In the solution with  $\text{pH} = 7$ :  $c(\text{Na}^+) > c(\text{H}_2\text{CO}_3)$   
 C: In the solution with  $\text{pH} = 10.3$ :  $c(\text{Na}^+) < 1.000 \times 10^{-3} \text{ mol} \cdot \text{L}^{-1}$   
 D: At  $25^{\circ}\text{C}$ , the equilibrium constant for the reaction  $\text{H}_2\text{CO}_3 + \text{CO}_3^{2-} \rightleftharpoons 2\text{HCO}_3^-$  is  $1.0 \times 10^4$

### Solution:

A. According to the information from the figure, in the solution with  $\text{pH} = a$ ,  $c(\text{CO}_3^{2-}) > c(\text{H}_2\text{CO}_3)$ , so statement A is incorrect.

B. In the solution with  $\text{pH} = 7$ , according to the information from the figure,  $c(\text{HCO}_3^-) > c(\text{H}_2\text{CO}_3) > c(\text{CO}_3^{2-})$ . According to charge conservation and  $\text{pH} = 7$ ,  $c(\text{Na}^+) = c(\text{HCO}_3^-) + 2c(\text{CO}_3^{2-})$ , so  $c(\text{Na}^+) > c(\text{H}_2\text{CO}_3)$ . Therefore, statement B is correct.

C. At  $25^{\circ}\text{C}$ , when  $\text{pH} = 6.3$ ,  $c(\text{H}_2\text{CO}_3) = c(\text{HCO}_3^-)$ , then  $K_a(\text{H}_2\text{CO}_3) = c(\text{H}^+) = 1.000 \times 10^{-6.3} \text{ mol} \cdot \text{L}^{-1}$ . In the solution with  $\text{pH} = 10.3$ ,  $c(\text{CO}_3^{2-}) = c(\text{HCO}_3^-)$ ,  $K_a(\text{HCO}_3^-) = c(\text{H}^+) = 1.000 \times 10^{-10.3} \text{ mol} \cdot \text{L}^{-1}$ . Then  $K_a(\text{H}_2\text{CO}_3) = \frac{c(\text{HCO}_3^-) \times c(\text{H}^+)}{c(\text{H}_2\text{CO}_3)} = \frac{c(\text{HCO}_3^-) \times 10^{-10.3}}{c(\text{H}_2\text{CO}_3)} = 10^{-6.3}$ . When  $\text{pH} = 10.3$ ,  $c(\text{CO}_3^{2-}) = c(\text{HCO}_3^-)$ , so  $\frac{c(\text{HCO}_3^-) + c(\text{CO}_3^{2-})}{c(\text{H}_2\text{CO}_3)} = 2 \times 10^4$ ,  $c(\text{H}_2\text{CO}_3) + c(\text{HCO}_3^-) + c(\text{CO}_3^{2-}) = 1.000 \times 10^{-3} \text{ mol} \cdot \text{L}^{-1}$ . Therefore,  $c(\text{H}_2\text{CO}_3) = 5.000 \times 10^{-8} \text{ mol} \cdot \text{L}^{-1}$ , and  $2c(\text{CO}_3^{2-}) = 1.000 \times 10^{-3} \text{ mol} \cdot \text{L}^{-1} - 5.000 \times 10^{-8} \text{ mol} \cdot \text{L}^{-1}$ . According to charge conservation,  $c(\text{Na}^+) > c(\text{HCO}_3^-) + 2c(\text{CO}_3^{2-})$ , i.e.,  $c(\text{Na}^+) > 3c(\text{CO}_3^{2-})$ , and  $c(\text{Na}^+) > 1.000 \times 10^{-3} \text{ mol} \cdot \text{L}^{-1}$ . Therefore, statement C is incorrect.

D. At  $25^{\circ}\text{C}$ , when  $\text{pH} = 6.3$ ,  $c(\text{H}_2\text{CO}_3) = c(\text{HCO}_3^-)$ , then  $K_a(\text{H}_2\text{CO}_3) = c(\text{H}^+) = 1.000 \times 10^{-6.3} \text{ mol} \cdot \text{L}^{-1}$ . Similarly, at  $\text{pH} = 10.3$ ,  $c(\text{CO}_3^{2-}) = c(\text{HCO}_3^-)$ , then  $K_a(\text{HCO}_3^-) = c(\text{H}^+) = 1.000 \times 10^{-10.3} \text{ mol} \cdot \text{L}^{-1}$ . The equilibrium constant for the reaction  $\text{H}_2\text{CO}_3 + \text{CO}_3^{2-} \rightleftharpoons 2\text{HCO}_3^-$  is:

$$K = \frac{c^2(\text{HCO}_3^-)}{c(\text{H}_2\text{CO}_3) \times c(\text{CO}_3^{2-})} = \frac{c(\text{HCO}_3^-) \times c(\text{HCO}_3^-) \times c(\text{H}^+)}{c(\text{H}_2\text{CO}_3) \times c(\text{CO}_3^{2-}) \times c(\text{H}^+)} = \frac{K_a(\text{H}_2\text{CO}_3)}{K_a(\text{HCO}_3^-)} = \frac{10^{-6.3}}{10^{-10.3}} = 1 \times 10^4$$

Therefore, statement D is correct.

In conclusion, the answer is A, C.

### GPT 4V's output:

First, we need to analyze the chart, which shows the variation of the negative logarithm of concentrations ( $-\lg c$ ) of  $\text{H}_2\text{CO}_3$ ,  $\text{HCO}_3^-$ ,  $\text{CO}_3^{2-}$ , and  $\text{H}^+$  at different pH values. This chart is a typical acid-base titration curve where  $\text{H}_2\text{CO}_3$  is a diprotic weak acid that can dissociate into  $\text{HCO}_3^-$  and  $\text{CO}_3^{2-}$ .

Option A: At  $\text{pH} = a$ , according to the chart, the concentration of  $\text{HCO}_3^-$  is the highest, followed by  $\text{H}_2\text{CO}_3$ , then  $\text{CO}_3^{2-}$ , and the concentration of  $\text{H}^+$  is the lowest. This is consistent with the chart.

Option B: At  $\text{pH} = 7$ , the concentration of  $\text{H}_2\text{CO}_3$  should be relatively low because it is a weak acid and does not dissociate completely at neutral pH. The concentration of  $\text{Na}^+$  depends on whether  $\text{NaOH}$  has been added. If  $\text{NaOH}$  has been added, the concentration of  $\text{Na}^+$  will increase. However, this option does not provide enough information to determine the exact concentration relationship between  $\text{Na}^+$  and  $\text{H}_2\text{CO}_3$ , so we cannot confirm if this option is correct.

Option C: At  $\text{pH} = 10.3$ , according to the chart, the concentration of  $\text{CO}_3^{2-}$  is the highest, and the concentration of  $\text{HCO}_3^-$  is very low at this pH. If  $\text{NaOH}$  is added to the solution, the concentration of  $\text{Na}^+$  will increase. However, since the total concentration  $c(\text{H}_2\text{CO}_3) + c(\text{HCO}_3^-) + c(\text{CO}_3^{2-}) = 1.000 \times 10^{-3} \text{ mol} \cdot \text{L}^{-1}$ , the concentration of  $\text{Na}^+$  cannot be lower than this value. Therefore, this option is incorrect.

Option D: The equilibrium constant  $K$  for the reaction  $\text{H}_2\text{CO}_3 + \text{CO}_3^{2-} \rightleftharpoons 2\text{HCO}_3^-$  can be expressed by the following equation:

$$K = \frac{[\text{HCO}_3^-]^2}{[\text{H}_2\text{CO}_3][\text{CO}_3^{2-}]}$$

According to the chart, at  $\text{pH} = 10.3$ , the concentrations of  $\text{HCO}_3^-$  and  $\text{CO}_3^{2-}$  are equal, which means  $K = 1.0 \times 10^4$  is impossible because this would require  $[\text{HCO}_3^-]$  to be much greater than  $[\text{CO}_3^{2-}]$ . Therefore, this option is also incorrect.

In summary, options C and D are incorrect. So the final answer is C, D.

Figure 20: An example of a chemistry problem with a visual reasoning error.

## Biology - Logical Reasoning Error

### Problem:

The bacterium *Bradyrhizobium japonicum* can infect soybean (*Glycine max*) roots and form nodules. The nitrogen fixation catalyzed by nitrogenase occurs in the nodules and the nitrogenase activity can be measured easily by acetylene reduction instead of nitrogen reduction. Scientists generated a defective mutation of  $\text{NAD}^+$ -dependent malic enzyme, the enzyme that generates pyruvate and NADH, and infected soybean seedling roots with wildtype and mutant bacteria. The seedlings were grown in nitrogen-free media. After 14 and 28 days of inoculation, the number and weight of nodules in the seedlings and acetylene reduction activity were recorded [figure1]. Which of the following statements are correct:

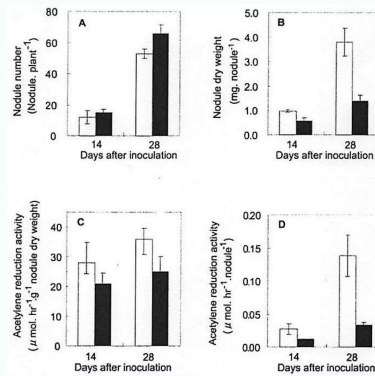

[figure1]: Nodule number and dry weight and acetylene reduction activity of soybean. Soybean nodules infected with wild-type *B. japonicum* (open bars) and the dme mutant (solid bars) are presented.

A: Nitrogen fixation activity in nodules of the same treatment at 28 days after inoculation is higher than that at 14 days after inoculation.

B: Both number and size of nodules increase with time from 14 to 28 days after inoculation with *B. japonicum*.

C: The reduction in nitrogen-fixing activity of nodules infected by the mutant at 28 days after inoculation compared to those at 14 days after inoculation is due to the reduction of nitrogenase activity and nodule formation.

D: Nitrogen fixation in *B. japonicum*-induced nodule is down-regulated by  $\text{NAD}^+$ -dependent malic enzyme.

### Solution:

A. True. As shown in the figure, in both wildtype and mutant treatments, acetylene reduction activity in nodules at 28 days after inoculation is higher than that at 14 days after inoculation, indicating higher nitrogen fixation activity.

B. True. In both treatments, number and size of nodules are higher at 28 days compared to those at 14 days after inoculation.

C. False. Number of nodules at 28 days after inoculation is higher than at 14 days after inoculation.

D. False. The mutation of  $\text{NAD}^+$ -dependent malic enzyme in the bacteria results in a reduction of acetylene reduction, indicating that the enzyme (in wildtype) up-regulates the nitrogen fixation.

So we choose A, B.

### GPT 4V's output:

Let's analyze the data presented in Fig.Q13 step by step:

A: We need to determine if nitrogen fixation activity in nodules of the same treatment at 28 days after inoculation is higher than that at 14 days after inoculation. Looking at the graphs C and D, which represent acetylene reduction activity (a proxy for nitrogen fixation activity), we can see that for both wild-type (open bars) and mutant (solid bars) *B. japonicum*, the activity is higher at 28 days than at 14 days. This is true for both per gram of nodule dry weight (graph C) and per nodule (graph D). Therefore, statement A is correct.

B: To assess this statement, we need to look at graphs A and B. Graph A shows the nodule number per plant, and graph B shows the nodule dry weight. For both wild-type and mutant *B. japonicum*, the number and size (weight) of nodules increase from 14 to 28 days after inoculation. Therefore, statement B is correct.

C: This statement suggests that the reduction in nitrogen-fixing activity of nodules infected by the mutant at 28 days after inoculation compared to those at 14 days is due to the reduction of nitrogenase activity and nodule formation. From graph C, we can see that the acetylene reduction activity per gram of nodule dry weight for the mutant does decrease from 14 to 28 days, indicating a reduction in nitrogenase activity. However, graph A shows that the number of nodules actually increases for the mutant from 14 to 28 days, which contradicts the second part of the statement. Therefore, statement C is not entirely correct.

D: The statement suggests that nitrogen fixation in *B. japonicum*-induced nodules is down-regulated by  $\text{NAD}^+$ -dependent malic enzyme. The mutant, which has a defective mutation in the  $\text{NAD}^+$ -dependent malic enzyme, shows lower acetylene reduction activity compared to the wild-type in both graphs C and D at both time points. This suggests that the enzyme plays a role in nitrogen fixation, and its absence (or defectiveness) leads to down-regulation of nitrogen fixation. Therefore, statement D is correct.

The final answer is A, B, D.

Figure 21: An example of a biology problem with a logical reasoning error.

### Geography - Knowledge Deficit Error

#### Problem:

From December 17 to 20, 2020, the Beijing team went to Tengchong, Yunnan to participate in the study tour course design competition, using the Beihai Wetland in Tengchong, known for its plateau volcanic dammed lakes, as the theme of the study tour course design. Based on this, complete the following small questions. During the study tour, the team members found that compared to Beijing, Tengchong has ( ).

- A. The tree shadows at sunrise are more towards the north.
- B. The temperature difference between day and night is larger.
- C. The sunset time is earlier.
- D. The tree shadows at noon are shorter.

#### Solution:

According to the material, Tengchong ( $25^{\circ}\text{N}$ ,  $98^{\circ}\text{E}$ ) belongs to Yunnan and is located to the southwest of Beijing ( $39^{\circ}\text{N}$ ,  $116^{\circ}\text{E}$ ). From December 17 to 20, 2020, it was winter, around the winter solstice, with the sun rising in the southeast and the shadow at sunrise being in the northwest. Beijing is at a higher latitude than Tengchong, causing a greater shadow deviation, so A is incorrect. Tengchong is located near a plateau volcanic dammed lake, rich in geothermal energy, resulting in high nighttime temperatures and smaller temperature differences between day and night, so B is incorrect. Tengchong, being at a lower latitude, has longer daylight hours and a later sunset time, making C incorrect. Tengchong's lower latitude also means a larger solar altitude angle at noon, leading to shorter tree shadows, so D is correct.

#### GPT 4V's output:

First, we need to understand the geographical locations of Beijing and Tengchong. Beijing is in the northern part of China, while Tengchong is in the southwestern part of China, near the Myanmar border. This means that Tengchong is to the southwest of Beijing.

A. The tree shadows at sunrise are more towards the north - Due to the Earth's rotation, the direction of tree shadows at sunrise is mainly determined by latitude, not by the east-west position. Therefore, this option is incorrect.

B. The temperature difference between day and night is larger - Tengchong is located in a plateau area, while Beijing is in a plain area. Generally, the temperature difference between day and night in plateau areas is larger than in plain areas because high-altitude areas cool down quickly at night and receive strong solar radiation during the day. Therefore, this option might be correct.

C. The sunset time is earlier - The sunset time is mainly determined by longitude, as the Earth rotates from west to east. Tengchong is to the southwest of Beijing, but this does not necessarily mean that the sunset time is earlier. This option requires more information to determine.

D. The tree shadows at noon are shorter - The solar altitude angle at noon depends on latitude; the lower the latitude, the higher the solar altitude angle, and the shorter the tree shadows. Tengchong has a lower latitude than Beijing, so the tree shadows at noon should be shorter.

In summary, options B and D are both possible. However, we need to determine which one is most related to the "plateau volcanic dammed lake" mentioned in the problem. Since this description emphasizes the plateau characteristics of Tengchong, we can reasonably infer that the larger temperature difference between day and night is most relevant to this characteristic. Therefore, the final answer is B.

Figure 22: An example of a geography problem with a knowledge deficit error.

## Astronomy - Incomplete Response

### Problem:

In order to move a spacecraft between orbits we must apply a thrust using rockets, which changes the velocity of the spacecraft by  $\Delta v$ . In this question we will ignore changes in the mass of the spacecraft due to the burning of fuel. For an object of mass  $m$  in a circular orbit of radius  $r$  around an object with mass  $M$  (where  $m \ll M$ ) the orbital velocity,  $v_{\text{orb}}$ , is given by the formula  $v_{\text{orb}} = \sqrt{\frac{GM}{r}}$ . Approximating Mars' orbit as circular with a radius of  $1.52 \text{ AU}$ , calculate the  $\Delta v$  to go from Earth LEO to Mars i.e.  $\Delta v = |\Delta v_A| + |\Delta v_B|$ . Compare your answer to the  $\Delta v$  to reach Earth LEO.

### Solution:

$$\begin{aligned}\Delta v_A &= \sqrt{\frac{6.67 \times 10^{-11} \times 1.99 \times 10^{30}}{1.49 \times 10^{11}}} \left( \sqrt{\frac{2 \times 1.52}{1 + 1.52}} - 1 \right) \\ &= 2935 \text{ m s}^{-1} \quad (= 2.94 \text{ km s}^{-1}) \\ \Delta v_B &= \sqrt{\frac{6.67 \times 10^{-11} \times 1.99 \times 10^{30}}{1.52 \times 1.49 \times 10^{11}}} \left( 1 - \sqrt{\frac{2 \times 1}{1 + 1.52}} \right) \\ &= 2642 \text{ m s}^{-1} \quad (= 2.64 \text{ km s}^{-1}) \\ \Delta v &= 2.94 + 2.64 \\ &= \boxed{5.58} \text{ km s}^{-1}\end{aligned}$$

[The  $\Delta v$  calculated here would be for the spacecraft to enter a circular orbit around the Sun at the same distance as Mars, but this would not constitute landing - the extra  $\Delta v$  to get to the Martian surface increases the total for the whole transfer to roughly  $8 \text{ km s}^{-1}$  (same as to get into LEO). Other, more complicated routes can be taken, some of which offer substantial efficiencies so the  $\Delta v$  for the trip can be much lower (although the time taken to complete the manoeuvre will be longer, and the  $\Delta v$  to reach LEO will still be the biggest single step)]

### GPT 4V's output:

To calculate the  $\Delta v$  to go from Earth Low Earth Orbit (LEO) to Mars, we need to consider two main maneuvers: the transfer from Earth's orbit to the transfer orbit (Hohmann transfer orbit), and then from the transfer orbit to Mars' orbit.

1. The first part of the  $\Delta v$ , denoted as  $\Delta v_A$ , is the change in velocity needed to move from Earth's orbit to the transfer orbit. This is the velocity at perihelion of the transfer orbit minus the Earth's orbital velocity.

2. The second part,  $\Delta v_B$ , is the change in velocity needed to move from the transfer orbit to Mars' orbit. This is Mars' orbital velocity minus the velocity at aphelion of the transfer orbit.

The Hohmann transfer orbit is an elliptical orbit that touches Earth's orbit at its closest point to the Sun (perihelion) and Mars' orbit at its farthest point from the Sun (aphelion).

The semi-major axis of the transfer orbit ( $a_t$ ) is the average of the Earth's orbital radius ( $r_E$ ) and Mars' orbital radius ( $r_M$ ). Given that 1 AU (Astronomical Unit) is approximately  $1.496 \times 10^8 \text{ km}$ , we have:

$$r_E = 1 \times 1.496 \times 10^8 \text{ km (Earth's orbit radius)} \quad r_M = 1.52 \times 1.496 \times 10^8 \text{ km (Mars' orbit radius)}$$

$$a_t = \frac{r_E + r_M}{2}$$

The orbital velocity of an object is given by  $v_{\text{orb}} = \sqrt{\frac{GM}{r}}$ , where  $G$  is the gravitational constant and  $M$  is the mass of the central object (in this case, the Sun).

The velocity at perihelion of the transfer orbit ( $v_{p,t}$ ) is given by:

$$v_{p,t} = \sqrt{\frac{GM}{r_E}} \times \sqrt{\frac{2r_M}{r_E + r_M}}$$

The velocity at aphelion of the transfer orbit ( $v_{a,t}$ ) is given by:

$$v_{a,t} = \sqrt{\frac{GM}{r_M}} \times \sqrt{\frac{2r_E}{r_E + r_M}}$$

The Earth's orbital velocity ( $v_E$ ) is:

$$v_E = \sqrt{\frac{GM}{r_E}}$$

Mars' orbital velocity ( $v_M$ ) is:

$$v_M = \sqrt{\frac{GM}{r_M}}$$

Now we can calculate  $\Delta v_A$  and  $\Delta v_B$ :

$$\Delta v_A = v_{p,t} - v_E \quad \Delta v_B = v_M - v_{a,t}$$

And the total  $\Delta v$  is:

$$\Delta v = |\Delta v_A| + |\Delta v_B|$$

Let's calculate these values step by step. We will use the gravitational constant  $G = 6.674 \times 10^{-20} \text{ km}^3 \text{ kg}^{-1} \text{ s}^{-2}$  and the mass of the Sun  $M = 1.989 \times 10^{30} \text{ kg}$ .

First, we calculate the semi-major axis of the transfer orbit:

$$a_t = \frac{1 \times 1.496 \times 10^8 + 1.52 \times 1.496 \times 10^8}{2}$$

Now, we calculate the velocities:

$$v_{p,t} = \sqrt{\frac{6.674 \times 10^{-20} \times 1.989 \times 10^{30}}{1.496 \times 10^8}} \times \sqrt{\frac{2 \times 1.52 \times 1.496 \times 10^8}{1.496 \times 10^8 + 1.52 \times 1.496 \times 10^8}}$$

$$v_{a,t} = \sqrt{\frac{6.674 \times 10^{-20} \times 1.989 \times 10^{30}}{1.52 \times 1.496 \times 10^8}} \times \sqrt{\frac{2 \times 1.496 \times 10^8}{1.496 \times 10^8 + 1.52 \times 1.496 \times 10^8}}$$

$$v_E = \sqrt{\frac{6.674 \times 10^{-20} \times 1.989 \times 10^{30}}{1.496 \times 10^8}}$$

$$v_M = \sqrt{\frac{6.674 \times 10^{-20} \times 1.989 \times 10^{30}}{1.52 \times 1.496 \times 10^8}}$$

Now we can calculate  $\Delta v_A$  and  $\Delta v_B$ :

$$\Delta v_A = v_{p,t} - v_E$$

$$\Delta v_B = v_M - v_{a,t}$$

And finally, the total  $\Delta v$ :

$$\Delta v = |\Delta v_A| + |\Delta v_B|$$

Let's calculate these values.

Figure 23: An example of an astronomy problem with an incomplete response.

## Computer Science - Understanding Error

### Problem:

A girl named Xenia has a cupboard that looks like an arc from ahead. The arc is made of a semicircle with radius  $r$  (the cupboard's top) and two walls of height  $h$  (the cupboard's sides). The cupboard's depth is  $r$ , that is, it looks like a rectangle with base  $r$  and height  $h+r$  from the sides. The figure below shows what the cupboard looks like (the front view is on the left, the side view is on the right). Xenia got lots of balloons for her birthday. The girl hates the mess, so she wants to store the balloons in the cupboard. Luckily, each balloon is a sphere with radius. Help Xenia calculate the maximum number of balloons she can put in her cupboard. [figure1] You can say that a balloon is in the cupboard if you can't see any part of the balloon on the left or right view. The balloons in the cupboard can touch each other. It is not allowed to squeeze the balloons or deform them in any way. You can assume that the cupboard's walls are negligibly thin.

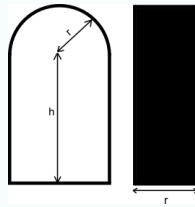

[figure1]

### Input

The single line contains two integers  $r, h$  ( $1 \leq r, h \leq 10^7$ )

### Output

Print a single integer — the maximum number of balloons Xenia can put in the cupboard.

### Examples

#### Input

1 1

#### Output

3

#### Input

1 2

#### Output

5

#### Input

2 1

#### Output

2

time limit: 2 seconds

memory limit: 256 megabytes

### GPT 4V's output:

```
import math

# Function to calculate the maximum number of balloons
def max_balloons(r, h):
    # Calculate the number of balloons that fit in the height of the walls
    balloons_in_height = (2 * h) // r

    # Calculate the number of balloons that fit in the semicircle on top
    # The diameter of the semicircle is r, so it can fit one balloon of radius r/2
    # The remaining height in the semicircle is r/2, which can fit another balloon
    balloons_in_semicircle = 1 + (h * 2 + r) // r

    # Calculate the number of additional balloons that can fit in the corners of the semicircle
    # This is the number of full r/2 radii that fit into the remaining arc length after placing
    # the first balloon in the semicircle
    remaining_arc_length = (math.pi * r // 2) - (r // 2)
    additional_balloons = int(remaining_arc_length // (r // 2))

    # The total number of balloons is the sum of the above calculated values
    total_balloons = balloons_in_height + balloons_in_semicircle + additional_balloons

    return total_balloons

# Read input
r, h = map(int, input().split())

# Calculate and print the result
print(max_balloons(r, h))
```

This program defines a function "max\_balloons" that calculates the maximum number of balloons that can fit in the cupboard based on the given dimensions. It then reads the input values for "r" and "h", calls the function with these values, and prints the result. The program takes into account the balloons that fit in the height of the walls, the semicircle on top, and additional balloons that can fit in the corners of the semicircle.

Figure 24: An example of a programming problem with an understanding error.

## 729 **G Consideration for Social Impact**

730 Certainly, it is essential to point out that as AI performs increasingly well on our benchmark,  
731 potentially even surpassing human capabilities, there are some potential ethical and moral risks that  
732 require collective oversight.

## 733 **H Limitations and Future Work**

734 Despite the value of this benchmark, there remains work to be done in the future. Firstly, our  
735 benchmark inevitably introduces some noisy problems, we will actively utilize community feedback  
736 to continuously refine it. Additionally, we aim to release new versions of the benchmark annually to  
737 mitigate issues related to data leakage. Moreover, this benchmark is currently limited to evaluating  
738 models' abilities to solve complex problems. In the future, we aspire for AI to assist with complex  
739 tasks and demonstrate value in real-world applications such as AI4Science and AI4Engineering rather  
740 than just problem-solving. This will be the goal of our future benchmark designs for evaluating AI  
741 capabilities. Nonetheless, at present, OlympicArena plays an essential role as a catalyst for further  
742 advancements.
